# Supplementary material for: MacSyFinder: A Program to Mine Genomes for Molecular Systems with an Application to CRISPR-Cas Systems
Source: PubMed Central journal article supplement (PMC4201578; doi:10.1371/journal.pone.0110726), 2014-10-17
Supplement: pone.0110726.s005.pdf [file pone.0110726.s005.pdf]

**Table S2. Impact of the co-localization parameter on the detection.**

| <b>inter_gene_max_space<br/>(D)</b> | <b>N_components<br/>detected<br/>(known Cas<br/>proteins)</b> | <b>N_clusters<br/>detected</b> | <b>% large clusters<br/>&gt; 13 genes</b> | <b>Maximal cluster size<br/>(N_total_genes)</b> |
|-------------------------------------|---------------------------------------------------------------|--------------------------------|-------------------------------------------|-------------------------------------------------|
| <b>4</b>                            | 10615                                                         | 1638                           | 6%                                        | 36                                              |
| <b>5</b>                            | 10663                                                         | 1628                           | 7%                                        | 36                                              |
| <b>6</b>                            | 10683                                                         | 1613                           | 8%                                        | 43                                              |
