# Supplementary material for: MacSyFinder: A Program to Mine Genomes for Molecular Systems with an Application to CRISPR-Cas Systems
Source: PubMed Central journal article supplement (PMC4201578; doi:10.1371/journal.pone.0110726), 2014-10-17
Supplement: pone.0110726.s006.pdf [file pone.0110726.s006.pdf]

**Table S3. Detection results.**

| N_Definitions |       | N_Components | N_Systems |      |
|---------------|-------|--------------|-----------|------|
| General       | 1     | General      | 10663     | 1628 |
| Typing        | 5     | Type I       | 7579      | 1100 |
|               |       | Type II      | 624       | 181  |
|               |       | Type III     | 2047      | 340  |
|               |       | Type U       | 27        | 7    |
|               |       | CAS*         | 66        | 20   |
|               | TOTAL | Typing       | 10343     | 1648 |
| SubTyping     | 7     | Type I-A     | 686       | 80   |
|               |       | Type I-B     | 1837      | 264  |
|               |       | Type I-C     | 1320      | 202  |
|               |       | Type I-D     | 340       | 50   |
|               |       | Type I-E     | 2227      | 298  |
|               |       | Type I-F     | 631       | 113  |
|               |       | Type I-U     | 203       | 54   |
|               | TOTAL |              | 7244      | 1061 |
|               | 3     | Type II-A    | 320       | 81   |
|               |       | Type II-B    | 18        | 5    |
|               |       | Type II-U*   | 283       | 94   |
|               | TOTAL |              | 621       | 180  |
|               | 3     | Type III-A   | 1057      | 155  |
|               |       | Type III-B   | 943       | 171  |
|               |       | Type III-U   | 9         | 3    |
|               | TOTAL |              | 2009      | 329  |
|               | 1     | Type U       | 27        | 7    |
|               | 1     | CAS*         | 80        | 24   |
|               | TOTAL | SubTyping    | 9981      | 1601 |

CAS\*: detected clusters containing only 3 of the Cas1, 2, 4 and 6 proteins, and no gene signature.

Type II-U\*: detected clusters containing only Cas1, Cas2 and Cas9 recently proposed as Type II-C [1]. Because they are difficult to distinguish with degraded Type II-A or Type II-B systems, we preferred classify them as Type II-U (U for unclassified).

## References

1. Chylinski K, Le Rhun A, Charpentier E (2013) The tracrRNA and Cas9 families of type II CRISPR-Cas immunity systems. *RNA Biol* 10: 726-737.
