# Supplementary material for: MacSyFinder: A Program to Mine Genomes for Molecular Systems with an Application to CRISPR-Cas Systems
Source: PubMed Central journal article supplement (PMC4201578; doi:10.1371/journal.pone.0110726), 2014-10-17
Supplement: pone.0110726.s009.pdf [file pone.0110726.s009.pdf]

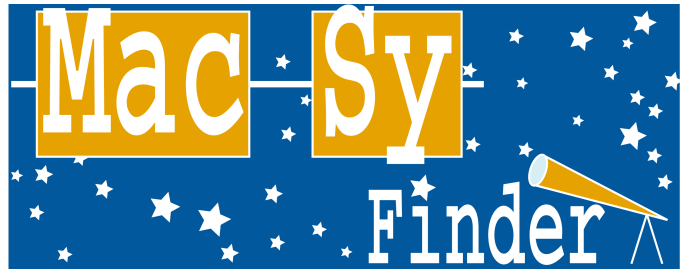

# MacSyFinder Documentation

*Release 1.0.0-RC3*

**Sophie Abby, Bertrand Néron**

September 11, 2014



# CONTENTS

|           |                                                        |           |
|-----------|--------------------------------------------------------|-----------|
| <b>I</b>  | <b>Running MacSyFinder</b>                             | <b>3</b>  |
| <b>1</b>  | <b>Installation</b>                                    | <b>5</b>  |
| 1.1       | MacSyFinder dependencies . . . . .                     | 5         |
| 1.2       | Installation procedure . . . . .                       | 5         |
| 1.3       | Uninstalling MacSyFinder . . . . .                     | 6         |
| <b>2</b>  | <b>MacSyFinder Quick Start</b>                         | <b>7</b>  |
| 2.1       | First trial with a test dataset . . . . .              | 7         |
| 2.2       | Visualizing expected results with MacSyView . . . . .  | 8         |
| <b>3</b>  | <b>Input and Options of MacSyFinder</b>                | <b>9</b>  |
| 3.1       | Input dataset . . . . .                                | 9         |
| 3.2       | Command-line options . . . . .                         | 9         |
| 3.3       | Configuration file . . . . .                           | 12        |
| 3.4       | In-house input files . . . . .                         | 14        |
| <b>4</b>  | <b>Output format</b>                                   | <b>17</b> |
| 4.1       | Hmmer results outputs . . . . .                        | 17        |
| 4.2       | Systems detection results . . . . .                    | 17        |
| 4.3       | Logs and configuration files . . . . .                 | 19        |
| 4.4       | File for MacSyview: results.macsyfinder.json . . . . . | 19        |
| <b>5</b>  | <b>MacSyView: visualizing MacSyFinder's results!</b>   | <b>21</b> |
| 5.1       | MacSyView How To . . . . .                             | 21        |
| 5.2       | Graphical output description . . . . .                 | 21        |
| 5.3       | Technology used . . . . .                              | 22        |
| 5.4       | Screenshot . . . . .                                   | 22        |
| <b>II</b> | <b>MacSyFinder functioning</b>                         | <b>25</b> |
| <b>6</b>  | <b>Macromolecular systems definition</b>               | <b>27</b> |
| 6.1       | Principles . . . . .                                   | 27        |
| 6.2       | The XML hierarchy . . . . .                            | 28        |
| <b>7</b>  | <b>MacSyFinder implementation overview</b>             | <b>31</b> |
| 7.1       | The System object . . . . .                            | 32        |
| 7.2       | The Gene object . . . . .                              | 32        |
| 7.3       | The Profile object . . . . .                           | 33        |
| 7.4       | Reporting Hmmer search results . . . . .               | 33        |

|            |                                                |           |
|------------|------------------------------------------------|-----------|
| <b>8</b>   | <b>MacSyFinder functioning</b>                 | <b>35</b> |
| 8.1        | Functioning overview . . . . .                 | 35        |
| 8.2        | A. Searching for systems' components . . . . . | 35        |
| 8.3        | B. Assessing systems presence . . . . .        | 36        |
| <b>III</b> | <b>MacSyFinder API documentation</b>           | <b>39</b> |
| <b>9</b>   | <b>Configuration API</b>                       | <b>41</b> |
| 9.1        | Config API reference . . . . .                 | 41        |
| <b>10</b>  | <b>Database API</b>                            | <b>47</b> |
| 10.1       | database API reference . . . . .               | 47        |
| <b>11</b>  | <b>System API</b>                              | <b>51</b> |
| 11.1       | SystemBank API reference . . . . .             | 51        |
| 11.2       | System API reference . . . . .                 | 52        |
| <b>12</b>  | <b>The Parser of Systems definitions</b>       | <b>55</b> |
| 12.1       | SystemParser API reference . . . . .           | 56        |
| <b>13</b>  | <b>Gene API</b>                                | <b>59</b> |
| 13.1       | GeneBank API reference . . . . .               | 59        |
| 13.2       | Gene API reference . . . . .                   | 60        |
| 13.3       | Homolog API reference . . . . .                | 63        |
| 13.4       | Analog API reference . . . . .                 | 63        |
| <b>14</b>  | <b>Profile API</b>                             | <b>65</b> |
| 14.1       | ProfileFactory API reference . . . . .         | 65        |
| 14.2       | Profile API reference . . . . .                | 65        |
| <b>15</b>  | <b>HMMReport API</b>                           | <b>67</b> |
| 15.1       | HMMReport API reference . . . . .              | 67        |
| 15.2       | GeneralHMMReport API reference . . . . .       | 69        |
| 15.3       | OrderedHMMReport . . . . .                     | 69        |
| 15.4       | GembaseHMMReport . . . . .                     | 69        |
| 15.5       | Hit . . . . .                                  | 69        |
| <b>16</b>  | <b>search_genes API reference</b>              | <b>71</b> |
| <b>17</b>  | <b>search_systems API reference</b>            | <b>73</b> |
| <b>18</b>  | <b>MacSyFinder errors</b>                      | <b>83</b> |
| 18.1       | macsypy_error API reference . . . . .          | 83        |
| <b>IV</b>  | <b>Indices and tables</b>                      | <b>85</b> |
|            | <b>Python Module Index</b>                     | <b>89</b> |
|            | <b>Index</b>                                   | <b>91</b> |

MacSyFinder is a program to model and detect macromolecular systems, genetic pathways... in protein datasets. In prokaryotes, these systems have often evolutionarily conserved properties: they are made of conserved components, and are encoded in compact loci (conserved genetic architecture). The user models these systems with MacSyFinder to reflect these conserved features, and to allow their efficient detection.

Criteria for systems detection include **component content (quorum)**, and **genomic co-localization**. Each component corresponds to a hidden Markov model (HMM) protein profile to perform homology searches with the program Hmmer.

**In order to model macromolecular systems, the user:**

- builds or gather from databanks **HMM protein profiles** for components of interest,
- defines **decision rules** for each system in a dedicated XML grammar (see *Macromolecular systems definition*).

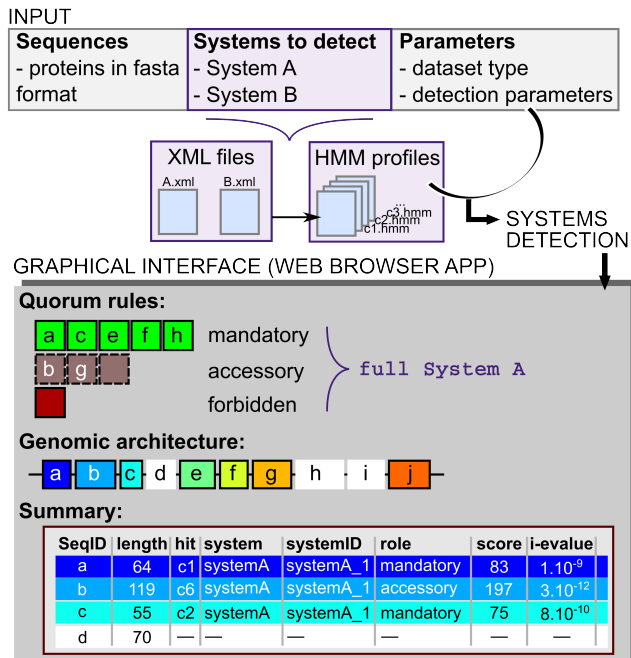



## **Part I**

# **Running MacSyFinder**





# INSTALLATION

## 1.1 MacSyFinder dependencies

MacSyFinder has two dependencies:

- the *formatdb* ( $\geq 2.2.26$ ) or *makeblastdb* ( $\geq 2.2.28$ ) tools provided with the Blast suite of programs ([http://blast.ncbi.nlm.nih.gov/Blast.cgi?CMD=Web&PAGE\\_TYPE=BlastDocs&DOC\\_TYPE=Download](http://blast.ncbi.nlm.nih.gov/Blast.cgi?CMD=Web&PAGE_TYPE=BlastDocs&DOC_TYPE=Download))
- the program *Hmmer* version 3.0 (<http://hmmer.janelia.org/>).

*formatdb* or *makeblastdb* and *hmmsearch* programs should be installed (*e.g.*, in the PATH) in order to use MacSyFinder. Otherwise, the paths to these executables must be specified in the command-line: see the *command-line options*.

**Python version 2.7** is required to run MacSyFinder: <https://docs.python.org/2.7/index.html>

## 1.2 Installation procedure

First unarchive the source codes package, and enter the extracted folder:

```
tar -xzf macsyfinder-x.x.tar.gz
cd macsyfinder-x.x
```

MacSyFinder installation follows classical “pythonic” installation procedure (see <http://docs.python.org/2/install/>):

```
python setup.py build
(sudo) python setup.py install
```

It is **highly recommended** to run tests before performing the full installation:

```
python setup.py build
python setup.py test -vv
(sudo) python setup.py install
```

---

**Note:** Super-user privileges (*i.e.*, `sudo`) are necessary if you want to install the program in the general file architecture.

---

**Note:** If you do not have the privileges, or if you do not want to install MacSyFinder in the Python libraries of your system, you can install MacSyFinder in a virtual environment (<http://www.virtualenv.org/>).

---

Procedures specific to MacSyFinder can be used instead of default. Please run the command for full options:

---

```
python setup.py --help
```

The main ones are:

```
python setup.py install --prefix /usr/local/home/bob/my_programs # Specifies an installation path
```

=> It will install MacSyFinder and required data (profiles folder and systems definition folders) in the Home directory of “bob”, in the “my\_programs” folder (useful if you do not have super-user privileges).

|                                                                                                                                  |
|----------------------------------------------------------------------------------------------------------------------------------|
| <p><b>Warning:</b> When installing a new version of MacSyFinder, do not forget to uninstall the previous version installed !</p> |
|----------------------------------------------------------------------------------------------------------------------------------|

## 1.3 Uninstalling MacSyFinder

To uninstall MacSyFinder (the last version installed), run:

```
(sudo) python setup.py uninstall
```

# MACSYFINDER QUICK START

In order to run MacSyFinder on your favorite dataset as soon as you have installed it, you can simply follow the next steps:

- Type: “`macyfinder -h`” to see all options available. All command-line options are described in the *Command-line options section*.
- On a “metagenomic” dataset for example:  
“`macyfinder --db-type unordered --sequence-db metagenome.fasta all`” will detect all systems modelled in `.xml` files placed in the default definition folder in a metagenomic dataset.  
“`macyfinder --db-type unordered --sequence-db metagenome.fasta -d mydefinitions/ all`” will detect all systems modelled in `.xml` files placed in the “*mydefinitions*” folder.
- On a completely assembled genome (where the gene order is known, and is relevant for systems detection):  
“`macyfinder --db-type ordered-replicon --sequence-db mygenome.fasta -d mydefinitions/ SystemA SystemB`” will detect the systems “*SystemA*” and “*SystemB*” in a complete genome from “*SystemA.xml*” and “*SystemB.xml*” definition files placed in the folder “*mydefinitions*”.

See *Input dataset* for more on input datasets.

---

**Note:** Systems have to be spelled in a case-sensitive way to run their detection from the command-line. The name of the system corresponds to the suffix defined for `.xml` files (`.xml` by default), for example “*toto*” for a system defined in “*toto.xml*”.

The “*all*” keyword allows to detect all systems available in the definition folder in a single run. See the *Command-line options*.

---

## 2.1 First trial with a test dataset

We included a test dataset in the MacSyFinder package. **By default, it will be installed** in `/share/macyfinder` or `/usr/share/macyfinder`. But it can be located elsewhere if it was specified during installation.

This dataset consists in the detection of CRISPR-Cas SubTypes with the definitions in the `/share/macyfinder/DEF` folder, using the profiles in the `/share/macyfinder/profiles` folder. This classification was previously described in Makarova et al. 2011, and the profiles are from the TIGRFAM database (release 13 of August 15 2012) and some of them were specifically designed for CRISPR-Cas classification (Haft et. al, 2005). The definitions are detailed in the MacSyFinder’s paper.

As a sequence dataset, we propose three replicons in `/share/macsyfinder/sequence_data/datatest_gembase.fasta`:

- *Escherichia coli* str. K-12 substr. MG1655 chromosome (ESCO001c01a). Genbank accession number: NC\_000913.
- *Haloarcula marismortui* ATCC 43049 plasmid pNG400 (HAMA001p04a). Genbank accession number: NC\_006392.
- *Legionella pneumophila* str. Paris, complete genome (LEPN003c01a). Genbank accession number: NC\_006368.

They were concatenated in a single fasta file, following the “gembase” format proposed [here](#), and thus MacSyfinder will treat the three different replicons separately for systems inference.

To run the detection and classification of all subtypes, type:

```
"macsyfinder --db-type gembase --sequence-db  
/share/macsyfinder/sequence_data/datatest_gembase.fasta all"
```

To run the detection of the Type-IE subtype only, type:

```
"macsyfinder --db-type gembase --sequence-db  
/share/macsyfinder/sequence_data/datatest_gembase.fasta CAS-TypeIE"
```

A sample topology file is included `/share/macsyfinder/sequence_data/datatest_gembase.topology`, and follows the convention in [here](#). It allows to specify a different topology “linear” or “circular” for each replicon in the “gembase” format. Otherwise, by default the topology is set to “circular”. It can also be specified in the command-line (see the [Command-line options](#)).

To run the detection using the topology file, type:

```
"macsyfinder --db-type gembase --sequence-db  
/share/macsyfinder/sequence_data/datatest_gembase.fasta  
--topology-file /share/macsyfinder/sequence_data/datatest_gembase.topology all"
```

## 2.2 Visualizing expected results with MacSyView

To have an idea of what should be detected with the above test dataset, run [MacSyView](#), the web-browser application for MacSyFinder’s results visualization. To do that, open the expected JSON result file with MacSyView: `/share/macsyfinder/sequence_data/results.macsyfinder.json`.

A screenshot of MacSyView is included [here](#).

# INPUT AND OPTIONS OF MACSYFINDER

## 3.1 Input dataset

The input dataset must be a set of protein sequences in **Fasta format** (see [http://en.wikipedia.org/wiki/FASTA\\_format](http://en.wikipedia.org/wiki/FASTA_format)).

The *base section* in the configuration file (see *Configuration file*) can be used to specify **the path** and the **type of dataset** to deal with, as well as the *-sequence\_db* and *-db\_type* parameters respectively, described in the *Command-line options* (see *Input options*).

Four types of protein datasets are supported:

- *unordered* : a set of sequences (*e.g.* a metagenomic dataset)
- *unordered\_replicon* : a set of sequences corresponding to a complete genome (*e.g.* an unassembled complete genome)
- *ordered\_replicon* : a set of sequences corresponding to an ordered complete replicon (*e.g.* an assembled complete genome)
- *gembase* : a set of multiple ordered replicons, which format follows the convention described in *Gembase format*.

For “ordered” (“ordered\_replicon” or “gembase”) datasets only, MacSyFinder can take into account the **shape of the genome**: “linear”, or “circular” for detection. The default is set to “circular”.

This can be set with the *-replicon\_topology* parameter from *Command-line options* (see *Input options*), or in the configuration in the *base section*.

With the “gembase” format, it is possible to specify a topology per replicon with a topology file (see *Gembase format* and *Topology files*).

## 3.2 Command-line options

Positional arguments:

```
systems          The systems to detect. This is an obligatory option
                  with no keyword associated to it. To detect all systems
                  described in .xml available, set to "all" (case insensitive).
                  Otherwise, a single or multiple systems can be specified.
                  For example: "SystemA SystemB".
```

### Optional arguments:

-h, --help Show the help message and exit

### Input dataset options:

--sequence-db SEQUENCE\_DB  
Path to the sequence dataset in fasta format.

--db-type {unordered\_replicon,ordered\_replicon,gembase,unordered}  
The type of dataset to deal with. "unordered\_replicon" corresponds to a non-assembled genome, "unordered" to a metagenomic dataset, "ordered\_replicon" to an assembled genome, and "gembase" to a set of replicons where sequence identifiers follow this convention:  
">RepliconName\_SequenceID"

--replicon-topology {linear,circular}  
The topology of the replicons (this option is meaningful only if the db\_type is 'ordered\_replicon' or 'gembase')

--topology-file TOPOLOGY-FILE  
Topology file path. The topology file allows to specify a topology (linear or circular) for each replicon (this option is meaningful only if the db\_type is 'ordered\_replicon' or 'gembase'. A topology file is a tabular file with two columns: the 1st is the replicon name, and the 2nd the corresponding topology: "RepliconA linear"

--idx  
Forces to build the indexes for the sequence dataset even if they were previously computed and present at the dataset location (default = False)

### Systems detection options:

--inter-gene-max-space SYSTEM VALUE  
Co-localization criterion: maximum number of components non-matched by a profile allowed between two matched components for them to be considered contiguous. Option only meaningful for 'ordered' datasets. The first value must match a system name, the second a number of components. This option can be repeated several times:  
"--inter-gene-max-space T3SS 12 --inter-gene-max-space Flagellum 20"

--min-mandatory-genes-required SYSTEM VALUE  
The minimal number of mandatory genes required for system assessment. The first value must correspond to a system name, the second value to an integer. This option can be repeated several times:  
"--min-mandatory-genes-required T2SS 15  
--min-mandatory-genes-required Flagellum 10"

--min-genes-required SYSTEM VALUE  
The minimal number of genes required for system assessment (includes both 'mandatory' and 'accessory' components). The first value must correspond to a system name, the second value to an integer. This

option can be repeated several times:

```
"--min-genes-required T2SS 15 --min-genes-required Flagellum 10"
```

```
--max-nb-genes SYSTEM VALUE
```

The maximal number of genes allowed in the system.

```
--multi-loci SYSTEM
```

Specifies if the system can be detected as a 'scattered' system. (default: False)

### Options for Hmmer execution and hits filtering:

```
--hmmer HMMER_EXE Path to the Hmmer program.
```

```
--index-db INDEX_DB_EXE
```

The indexer to be used for Hmmer. The value can be either 'makeblastdb' or 'formatdb' or the path to one of these binary (default = makeblastb).

```
--e-value-search E_VALUE_RES
```

Maximal e-value for hits to be reported during Hmmer search. (default = 1)

```
--i-evalue-select I_EVALUE_SEL
```

Maximal independent e-value for Hmmer hits to be selected for system detection. (default = 0.001)

```
--coverage-profile COVERAGE_PROFILE
```

Minimal profile coverage required in the hit alignment to allow the hit selection for system detection. (default = 0.5)

### Path options:

```
-d DEF_DIR, --def DEF_DIR
```

Path to the systems definition files.

```
-r RES_SEARCH_DIR, --res-search-dir RES_SEARCH_DIR
```

Path to the directory where to store MacSyFinder search results directories.

```
--res-search-suffix RES_SEARCH_SUFFIX
```

The suffix to give to Hmmer raw output files.

```
--res-extract-suffix RES_EXTRACT_SUFFIX
```

The suffix to give to filtered hits output files.

```
-p PROFILE_DIR, --profile-dir PROFILE_DIR
```

Path to the profiles directory.

```
--profile-suffix PROFILE_SUFFIX
```

The suffix of profile files. For each 'Gene' element, the corresponding profile is searched in the 'profile\_dir', in a file which name is based on the Gene name + the profile suffix. For instance, if the Gene is named 'gspG' and the suffix is '.hmm3', then the profile should be placed in the specified folder 'profile\_dir' and be named 'gspG.hmm3'. (default: ".hmm")

### General options:

`-w WORKER_NB, --worker WORKER_NB` Number of workers to be used by MacSyFinder. In the case the user wants to run MacSyFinder in a multi-thread mode. All workers can be used with the value '0'. (default = 1)

`-v, --verbosity` Increases the verbosity level. There are 4 levels: Error messages (default), Warning (-v), Info (-vv) and Debug(-vvv).

`--log LOG_FILE` Path to the directory where to store the 'macsyfinder.log' log file.

`--config CFG_FILE` Path to a putative MacSyFinder configuration file to be used.

`--previous-run PREVIOUS_RUN` Path to a previous MacSyFinder run directory. It allows to skip the Hmmer search step on same dataset, as it uses previous run results and thus parameters regarding Hmmer detection. The configuration file from this previous run will be used. It is in conflict with options:  
--config,  
--sequence\_db,  
--profile-suffix,  
--res-extract-suffix,  
--e-value-res,  
--db-type,  
--hmmer

## 3.3 Configuration file

Options to run MacSyFinder can be specified in a configuration file. The *Config* handles all configuration options for MacSyFinder. Three locations are parsed to find configuration files:

- `$(PREFIX)/etc/macsyfinder/macsyfinder.conf`
- `$(HOME)/.macsyfinder/macsyfinder.conf`
- `./macsyfinder.conf`

Moreover these three locations options can be passed on the command-line.

Each file can define options, at the end all options are added. If an option is specified several times:

---

**Note:** The precedence rules from the less important to the more important are:

`$(PREFIX)/etc/macsyfinder/macsyfinder.conf` < `$(HOME)/.macsyfinder/macsyfinder.conf` < `./macsyfinder.conf` < "command-line" options

---

This means that command-line options will always bypass those from the configuration files. In the same flavor, options altering the definition of systems found in the command-line or the configuration file will always overwhelm values from systems' *XML definition files*.

The configuration files must follow the Python "ini" file syntax. The Config object provides some default values and performs some validations of the values, for instance:



In MacSyFinder, five sections are defined:

- **base** : all information related to the protein dataset under study
  - *file* : the path to the dataset in Fasta format (*no default value*)
  - *type* : the type of dataset to handle, four types are supported:
    - \* *unordered* : a set of sequences (*e.g.* a metagenomic dataset)
    - \* *unordered\_replicon* : a set of sequences corresponding to a complete replicon (*e.g.* an unassembled complete genome)
    - \* *ordered\_replicon* : a set of sequences corresponding to a complete replicon ordered (*e.g.* an assembled complete genome)
    - \* *gembase* : a set of multiple ordered replicons.

(*no default value*)
  - *replicon\_topology* : the topology of the replicon under study. Two topologies are supported: ‘linear’ and ‘circular’ (*default* = ‘circular’) This option will be ignored if the dataset type is not ordered (*i.e.* “unordered\_replicon” or “unordered”).
- **system**
  - *inter\_gene\_max\_space* = list of system name and integer separated by spaces. These values will supersede the values found in the system definition file.
  - *min\_mandatory\_genes\_required* = list of system name and integer separated by spaces. These values will supersede the values found in the system definition file.
  - *min\_genes\_required* = list of system name and integer separated by spaces. These values will supersede the values found in the system definition file.
- **hmmer**
  - *hmmer\_exe* (default= *hmmsearch* )
  - *index\_db\_exe* the executable to use to build the index for the hmm. The value can be ‘makeblastdb’ or ‘formatdb’ or the absolute path toward one of these two binaries (default= *makeblastdb* )
  - *e\_value\_res* = (default= *1* )
  - *i\_value\_sel* = (default= *0.5* )
  - *coverage\_profile* = (default= *0.5* )
- **directories**
  - *res\_search\_dir* = (default= *./datatest/res\_search* )
  - *res\_search\_suffix* = (default= *.search\_hmm.out* )
  - *profile\_dir* = (default= *./profiles* )
  - *profile\_suffix* = (default= *.fasta-aln\_edit.hmm* )
  - *res\_extract\_suffix* = (default= *.res\_hmm\_extract* )
  - *def\_dir* = (default= *./DEF/* )
- **general**

- *log\_level*: (default= *debug* ) This corresponds to an integer code:

| Level    | Numeric value |
|----------|---------------|
| CRITICAL | 50            |
| ERROR    | 40            |
| WARNING  | 30            |
| INFO     | 20            |
| DEBUG    | 10            |
| NOTSET   | 0             |

- *log\_file* = (default = *macsyfinder.log* in directory of the run)

Example of a configuration file:

```
[base]
prefix = /path/to/macsyfinder/home/
file = %(prefix)s/dataset/prru_psae.001.c01.fasta
type = gembase
replicon_topology = circular

[system]
inter_gene_max_space = T2SS 22 Flagellum 44
min_mandatory_genes_required = T2SS 6 Flagellum 4
min_genes_required = T2SS 8 Flagellum 4

[hmmer]
hmmer_exe = hmmsearch
index_db_exe = makeblastdb
e_value_res = 1
i_evalue_sel = 0.5
coverage_profile = 0.5

[directories]
prefix = /path/to/macsyfinder/home/
def_dir = %(prefix)s/data/DEF
res_search_dir = %(prefix)s/dataset/res_search/
res_search_suffix = .raw_hmm
profile_dir = %(prefix)s/data/profiles
profile_suffix = .fasta-aln.hmm
res_extract_suffix = .res_hmm

[general]
log_level = debug
```

---

**Note:** After a run, the corresponding configuration file (“*macsyfinder.conf*”) is generated as a (re-usable) output file that stores every options used in the run. It is stored in the results’ directory (see *the output section*).

---

## 3.4 In-house input files

### 3.4.1 Gembase format

In order to allow the users running MacSyFinder on a bunch of genomes in a single run, we propose to adopt the following convention to fulfill the requirements for the “*gembase db\_type*”. It consists in providing for each protein, both the replicon name and a protein identifier separated by a “*\_*” in the first field of fasta headers. For instance:

```

>PlasmidA_0001 YP_003225072.1_ | putative stcE protein
MKLKYLSCMILASLAMGAFafaataadnnsaiyfnttqpvndlqgglaaevk
FAQSQILSAHPKEGESQqhltslrkslllvrlvkaddktpvqvqveardand
KILGTLTSPSSSLPDTVYHLDGVPADGIDFTPQNGTKKIINTVAEVNKL
SDASGSSIKSYLANALVEIQTANGRWIRDMYLPQGAEELEGKMRVFSYA
GYNSTVFYGRKVTLSVGNLTLFKYVNGQWFRSGELENNRIAYAQHTWSA
ELPAHWIVPGLNLVIKQGNLGSGLNDINVGAPGELLTIDIGMLTTPRG
RFDFAKDKEAHREYFQTIPVSRMIVNRYAPLHLKEVMLPTGTLTLDADPG
>PlasmidA_0002 YP_003225073.1_ | type II secretion protein EtpC
MLFFLSSRRDRNLFIKDIALKMLTPNWVLCVILLIAGYQLVSVIRHFWLT
PATASADLSHVSSETAVTDEHTEENFVFTLFGTASPPLSEGKVVQKTSS
LSDLLSGGDLVDRGILYSSVTEHSVAIFAHNNRQFSLGIGEKVPGYDAT
ISAIKSDHIVINYQGNASLPLRYDNPakRNAQDDNNLIVGPVTTQANFR
VKNIFDIMSLSPVTVNNTLSGYRLSPGKASSLFYNAGLHDNDLAVLLNGS
ELRDRQAKQIMKQLTELKEIKITVERDGQLYDAFIAVGEN
....
>ChromosomeA_0001 _YP_003573410.1_ | adhesin-like protein
MKKLFLEFAALLMTGFafyscedvvdnPAQDPAQSWNYSVSVKFADFDFNG
AVDENSVPYTYKAPTTLYVLNEENTLMGTITTDAAIPAIGDYGTAGTLTG
SIGNLIITTKIGNDLTKQDGLKSAIENGIVQTAEVPIKIYNANSGTLT
TASAKMDNTAAIAYTSLGYIKGGDKILFVEGNQTFEWTVNEEFDPTSTD
LYIALPMNTDPETEYTISSDSKDGyTRGGTFKLADYPTLAAGKVSNYIGG
IPFIQTGVDLTKWDAYMRTDPNNTWYMNINNGWPATFSQEVEDGKSFIV
TQSGPTLDSLNVVVGVTGKEVNVTLNIRLGKDRSINIGDKHGWVEYDG
THDIYGWGAKANVTLIGENECETLYIQCPATKKGEGTLNKNLSIDSYGS
>ChromosomeA_0020 _YP_003573411.1_ | hypothetical protein
MKRIVLITLVSILTTFQAIAQVANGFYRVQNNASSRYITLRDNAVGTVDY
SSTNVDSLNIIVTWSGFDKVKSNPASIYVEQHDSKYDLKVQGTGIYAITG
GRTYLELRPKDSGYILAVTYNGMEGRLYDSEEDVDGEGYVKRSGNSAYQY
WSFIPVDTENNYIGLQPTVQVGDNYGTLYASYPFKAASSGIKFYYVDAI
....

```

### 3.4.2 Topology files

To be able to attribute a topology per replicon/genome when using the Gembase format, we propose the user to build a “topology file” in the form of a tabular file with two columns separated by a “:”. The 1st column is the replicon name, and the 2nd the corresponding topology. Comments can be written after a “#”.

For example:

```

# comment line
PlasmidA : circular
ChromosomeA : linear
ChromosomeB : circular

```

---

**Note:** A topology file can be specified on the command-line with the “--topology-file” parameter.

---



# OUTPUT FORMAT

MacSyFinder provides different types of outputs. At each run, MacSyFinder creates a new folder, whose name is based on a fixed prefix and a random suffix, for instance “macyfinder-20130128\_08-57-46”. MacSyFinder outputs are stored in this run-specific folder.

## 4.1 Hmmer results outputs

Raw Hmmer outputs are provided, as long with processed tabular outputs that includes hits filtered as specified by the user. For instance, the Hmmer search for SctC homologs with the corresponding profile will produce as a result two files: “sctC.search\_hmm.out” and “sctC.res\_hmm\_extract”.

The processed output “sctC.res\_hmm\_extract” recalls on the first lines the parameters used for hits filtering and relevant information on the matches, as for instance:

```
# gene: sctC extract from /Users/bob/macyfinder_results/  
      macyfinder-20130128_08-57-46/sctC.search_hmm.out hmm output  
# profile length= 544  
# i_evalue threshold= 0.001000  
# coverage threshold= 0.500000  
# hit_id replicon_name position_hit hit_sequence_length gene_name gene_system i_eval score  
  profile_coverage sequence_coverage begin end  
PSAE001c01_006940      PSAE001c01      3450      803      sctC      T3SS      1.1e-41 141.6  
      0.588235 0.419676      395      731  
PSAE001c01_018920      PSAE001c01      4634      776      sctC      T3SS      9.2e-48 161.7  
      0.976103 0.724227      35      596  
PSAE001c01_031420      PSAE001c01      5870      658      sctC      T3SS      2.7e-52 176.7  
      0.963235 0.844985      49      604  
PSAE001c01_051090      PSAE001c01      7801      714      sctC      T3SS      1.9e-46 157.4  
      0.571691 0.463585      374      704
```

---

**Note:** Each tabular output file contains a header line describing each column in the output.

---

## 4.2 Systems detection results

Different types of tabular outputs are provided. Headers are provided with the content of the lines in the file.

- macyfinder.tab - for “**ordered**” datasets only (db\_type is “ordered\_replicon” or “gembase”). It provides a summary of the number of each type of systems that have been detected.

- `macsfinder.report` - contains all the sequence identifiers of proteins detected as being part of a system, along with statistics on the Hmmer hit, and the status of the component in the system.
- `macsfinder.summary` - contains a line of information for each detected system.

### 4.2.1 `macsfinder.tab`

For each replicon, a line gives the occurrences of systems that were asked for detection. For example, if the detection was run for the Flagellum and the T6SS, the output will look like:

```
#Replicon Flagellum_single_locus Flagellum_multi_loci T6SS_single_locus T6SS_multi_loci
escherichia06 1 1 1 0
```

which means that this “`escherichia06`” genome harbors 1 flagellum in a single locus, 1 flagellum scattered on multiple loci, and 1 T6SS in a single locus.

### 4.2.2 `macsfinder.report`

Each line corresponds to a “hit” that has been assigned to a detected system. It includes:

- `Hit_Id` - the sequence identifier of the hit
- `Replicon_name` - the name of the replicon it belongs to
- `Position` - the position of the sequence in the replicon
- `Sequence_length` - the length of the sequence
- `Gene` - the name of the components matched with the profile
- `Reference_system` - the system that includes the component matched
- `Predicted_system` - the system assigned
- `System_Id` - the unique identifier attributed to the detected system
- `System_status` - the status of the detected system
- `Gene_status` - the status of the component in the assigned system’s definition
- `i-value` - Hmmer statistics, the indepent-evalue
- `Score` - Hmmer score
- `Profile_coverage` - the percentage of the profile covered by the alignment with the sequence
- `Sequence_coverage` - the percentage of the sequence covered by the alignment with the profile
- `Begin_match` - the position in the sequence where the profile match begins
- `End_match` - the position in the sequence where the profile match ends

### 4.2.3 `macsfinder.summary`

Each line corresponds to a system that has been detected. It includes:

- `Replicon_name` - the name of the replicon
- `System_Id` - the unique identifier attributed to the detected system
- `Reference_system` - the type of system detected
- `System_status` - the status of the system

- Nb\_loci - the number of loci that constitutes the system
- Nb\_Ref\_mandatory - the number of mandatory genes in the system definition
- Nb\_Ref\_accessory - the number of accessory genes in the system definition
- Nb\_Ref\_Genes\_detected\_NR - the number of different components (accessory+mandatory) in the system
- Nb\_Genes\_with\_match - the number of components detected with the profiles in the system
- System\_length - the full number of components (with match or not) in the locus (or loci) that constitutes the system
- Nb\_Mandatory\_NR - the number of different mandatory components matched
- Nb\_Accessory\_NR - the number of different accessory components matched
- Nb\_missing\_mandatory - the number of mandatory components from the system definition with no match in this system occurrence
- Nb\_missing\_accessory - the number of accessory components from the system definition with no match in this system occurrence
- List\_missing\_mandatory - the list of the missing mandatory components
- List\_missing\_accessory - the list of the missing accessory components
- Loci\_positions - the sequence position (rank of the fasta sequence in the input sequence file) of the different loci encoding the system
- Occur\_Mandatory - counts of the mandatory components
- Occur\_Accessory - counts of the accessory components
- Occur\_Forbidden - counts of the forbidden components

### 4.3 Logs and configuration files

Three specific output files are built to store information on the MacSyFinder execution:

- macsyfinder.out - contains information on the procedure during systems detection: clusters found, decisions made for system inference... The same information is also displayed on the standard output.
- macsyfinder.conf - contains the configuration information of the run. It is useful to recover the parameters used for the run.
- macsyfinder.log - the log file, contains raw information on the run. Please send it to us with any bug report.

### 4.4 File for MacSyview: results.macsyfinder.json

This file in JSON format is used by MacSyView, for graphical output purpose. It must be loaded through MacSyView to graphically visualize detected systems. For more details, see *MacSyView's description*.





# MACSYVIEW: VISUALIZING MACSYFINDER'S RESULTS!

MacSyView is a standalone web-browser application to visualize MacSyFinder's detected systems. MacSyView relies on JSON files outputted by MacSyFinder to display the list of detected systems, and a detailed view of each system. It allows visualizing the content of systems, their genomic context, and generates SVG files that can be exported for drawing purpose.

## 5.1 MacSyView How To

1. Run MacSyFinder to detect your favorite system!
2. Launch MacSyView:
  - Either, **run the wrapper 'macsyview'** installed with MacSyFinder's binaries (*i.e.*, *macsyfinder* - for Linux).
  - Or **open with your web-browser the html page:** `/usr/share/macsyview/index.html` or `/share/macsyview/index.html` (or in the path specified during installation for data associated with MacSyFinder).
3. Select the .json output file in the output directory of the run
4. Choose the system you want to visualize in the list...
5. ...and here it is!

---

**Note:** The MacSyView application runs everything on the user's computer, even if it uses the technologies of Web browsers. No data are sent out of the user's device.

---

## 5.2 Graphical output description

The content of the system view depends on the type of the input dataset.

- upper panel: an overview of the effectiveness of detected components is displayed **for all types** of datasets, per type of components in the system definition. It is a direct representation of how the definition was fulfilled during detection.
- middle panel: only for **ordered datasets**, the detected system is shown in its genomic context, including nearby proteins that were not annotated as system's components.

- lower panel: for **all datasets**, a table containing information on detected components (and eventually nearby proteins for ordered datasets) is displayed. It includes sequence information, and in the case of system's components, Hmmer hit information, and function assigned in the system.

## 5.3 Technology used

MacSyView was coded in Javascript and uses third-party libraries that are all accredited in the COPYRIGHT file distributed with the MacSyFinder/MacSyView package.

It includes among others:

- the [Raphael library](#) for systems drawing,
- the [Bootstrap library](#) for HTML design and
- the [Mustache library](#) for HTML templating in Javascript.

The [JQuery](#), [jQuery-mousewheel](#) and [Raphael.Export](#) libraries were also used.

It was tested on Chromium and Firefox for Linux, and on Chrome, Firefox and Safari for Mac OS X.

## 5.4 Screenshot

Here is a view of one of the three systems detected with the example dataset *presented here*:

New search or  
Back to systems

MacSyView Back to systems list

Components for system ESCO001c01a\_CAS-TypeI\_E\_1 (single\_locus)

Replicon ESCO001c01a (length: 4141, topology: circular)

Repertoire of components for detected CAS-TypeI system

hover boxes to display information

mandatory

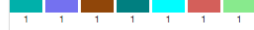

accessory

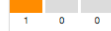

forbidden

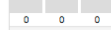

Detected  
Components

Genomic context for detected CAS-TypeI system

hover boxes to display information

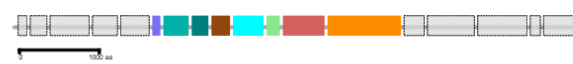

System's  
genomic  
architecture

Hits summary for detected CAS-TypeI system

| Color | Sequence Id        | Position | Profile Match | Function  | Gene status | System | Protein length (aa) | Score    | I-evalue | Profile coverage | Sequence coverage | Begin match | End match |
|-------|--------------------|----------|---------------|-----------|-------------|--------|---------------------|----------|----------|------------------|-------------------|-------------|-----------|
|       | ESCO001c01a_027720 | 2592     |               |           |             |        | 107                 |          |          |                  |                   |             |           |
|       | ESCO001c01a_027730 | 2593     |               |           |             |        | 201                 |          |          |                  |                   |             |           |
|       | ESCO001c01a_027740 | 2594     |               |           |             |        | 475                 |          |          |                  |                   |             |           |
|       | ESCO001c01a_027750 | 2595     |               |           |             |        | 302                 |          |          |                  |                   |             |           |
|       | ESCO001c01a_027760 | 2596     |               |           |             |        | 345                 |          |          |                  |                   |             |           |
|       | ESCO001c01a_027770 | 2597     | cas2_TypeI_E  | mandatory | CAS-TypeI_E | 94     | 143.8               | 5.3e-43  | 1.00     | 0.91             | 3                 | 88          |           |
|       | ESCO001c01a_027780 | 2598     | cas1_TypeI_E  | mandatory | CAS-TypeI_E | 305    | 377.9               | 8.8e-114 | 0.99     | 0.87             | 8                 | 272         |           |
|       | ESCO001c01a_027790 | 2599     | cas6_TypeI_E  | mandatory | CAS-TypeI_E | 199    | 270.3               | 6.1e-81  | 1.00     | 1.00             | 1                 | 199         |           |
|       | ESCO001c01a_027800 | 2600     | cas5_TypeI_E  | mandatory | CAS-TypeI_E | 224    | 288.4               | 1.5e-86  | 1.00     | 0.96             | 3                 | 216         |           |

List of Hits



## **Part II**

# **MacSyFinder functioning**



# MACROMOLECULAR SYSTEMS DEFINITION

## 6.1 Principles

MacSyFinder relies on the definition of models of macromolecular systems with an **XML grammar** that is described *below*.

A system is defined in a dedicated file named after the system (*e.g.*, 'T1SS.xml' for T1SS, the Type 1 Secretion System) by a set of **components** (*i.e.* proteins, or protein-coding genes given the context) with different attributes and that are used for **content description**. Some components are specific to the system, and some are possibly from other systems. In the latter case, the full description of the gene with its attributes must be defined in the XML file of the original system. Features regarding **co-localization** parameters for system detection are also defined in this system-specific file.

Three distinct types of components can be used to model a given system content, and which corresponds to Gene objects, and the corresponding HMM protein profiles.

- **Mandatory** components represent essential components to be found to infer the System presence.
- **Accessory** components correspond to components that can be found in some systems occurrence, or fastly evolving components that are hard to detect with a single profile.
- **Forbidden** components are components which presence is eliminatory for the System assessment.

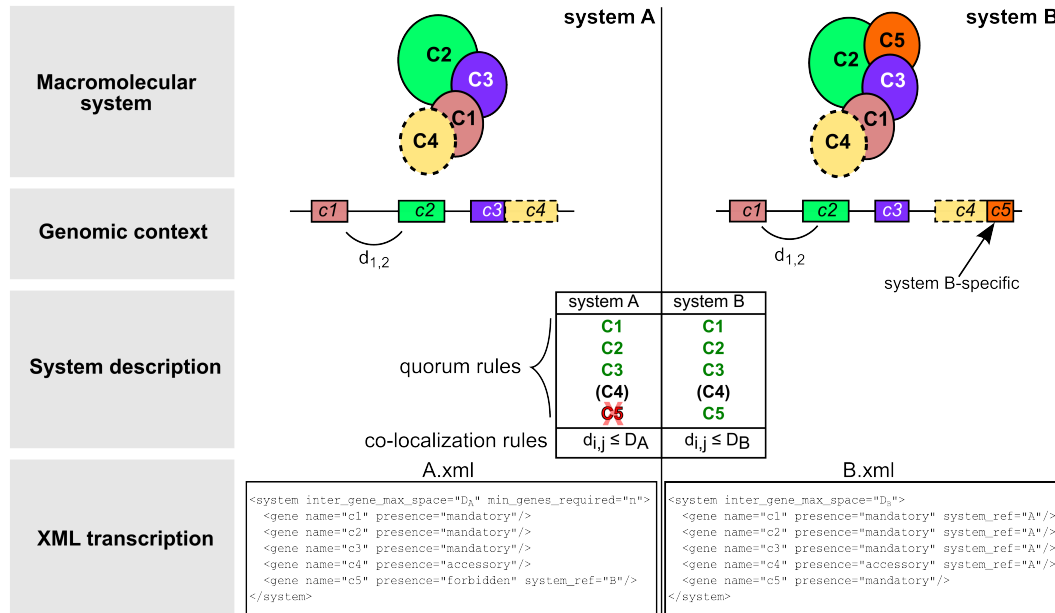

## 6.2 The XML hierarchy

- The element root is “system”.
  - It has a mandatory attribute: “inter\_gene\_max\_space”, an integer representing the maximal number of components without a match between two components with a match for a component profile.
  - The element “system” may have attributes:
    - \* “min\_mandatory\_genes\_required”: an integer representing the minimal number of mandatory genes required to infer the system presence.
    - \* “min\_genes\_required”: an integer representing the minimal number of mandatory or accessory genes (whose corresponding proteins match a profile of the system) required to infer the system presence.
    - \* “max\_nb\_genes”: an integer representing the maximal number of mandatory or accessory genes in the system.
    - \* “multi\_loci”: a boolean set to True (“1”, “true” or “True”) to allow the definition of “scattered” systems (systems encoded by different loci). If not specified, *default value is false*.
  - The system contains one or more element “gene”.
- The element “gene” has several mandatory attributes:
  - “name”: which must match to a profile in the profile directory.
  - “presence”: which can take three values “mandatory”, “accessory”, “forbidden”.

The element “gene” may have other attributes:

- “system\_ref”: which is a reference to the macromolecular system from where the gene comes from (this attribute is used for forbidden gene and homologs gene). If system\_ref is not specified, it means the gene is from the current system.



- “loner”: which is a boolean. If a gene is loner that means this gene can be isolated on the genome ( *default false* ).
  - “exchangeable”: which is a boolean. If a gene is exchangeable (value set to “1”, “true” or “True”) that means this gene or one of its homologs or analogs can be interchanged for the assessment of the presence of the macromolecular system ( *default false* ).
  - “multi\_system”: which is a boolean. If a gene is “multi\_system” (value set to “1”, “true” or “True”), it means that it can be used to fill by multiple systems occurrences. ( *default false* ).
  - “aligned”: which is a boolean (this attribute is used only for homologs).
  - “inter\_gene\_max\_space”: an integer that defines gene-wise value of system’s “inter\_gene\_max\_space” parameter (see above).
  - an element “homologs” that contains a list of homologous genes that can potentially match the same sequences. They can potentially be functionally equivalent to the reference gene if it was declared “exchangeable”
  - an element “analogs” that contains a list of analogous genes that can potentially be functionally equivalent, if the parent gene was declared “exchangeable”.
- The elements “homologs” and “analogs” can contain one or more element “gene”.

Example of a system definition in XML:

```
<system inter_gene_max_space="5">
  <gene name="gspD" presence="mandatory">
    <homologs>
      <gene name="sctC" system_ref="T3SS"/>
    </homologs>
  </gene>
  <gene name="sctN_FLG" presence="mandatory" loner="1" exchangeable="1"/>
    <analogs>
      <gene name="gspE" system_ref="T2SS"/>
      <gene name="pilT" system_ref="T4P"/>
    </analogs>
  <gene name="sctV_FLG" presence="mandatory"/>
  <gene name="flp" presence="accessory"/>
</system>
```

**Warning:**

- a gene is identified by its name.
- a gene can be defined only **once** in all systems.
- other occurrences of this gene must be specified as references (using the “system\_ref” attribute to specify what is the native system).
- if a gene is specified with the attribute “system\_ref”, it means it has been (or has to be) defined in the system specified by “system\_ref”.
- if a gene is not specified with the attribute “system\_ref”, it means it belongs to the current system, where it has to be defined with all its features.



# MACSYFINDER IMPLEMENTATION OVERVIEW

MacSyFinder is implemented with an object-oriented architecture. The objects are described in the current *API documentation*. An overview of the main classes used to model the systems to be detected is provided below.

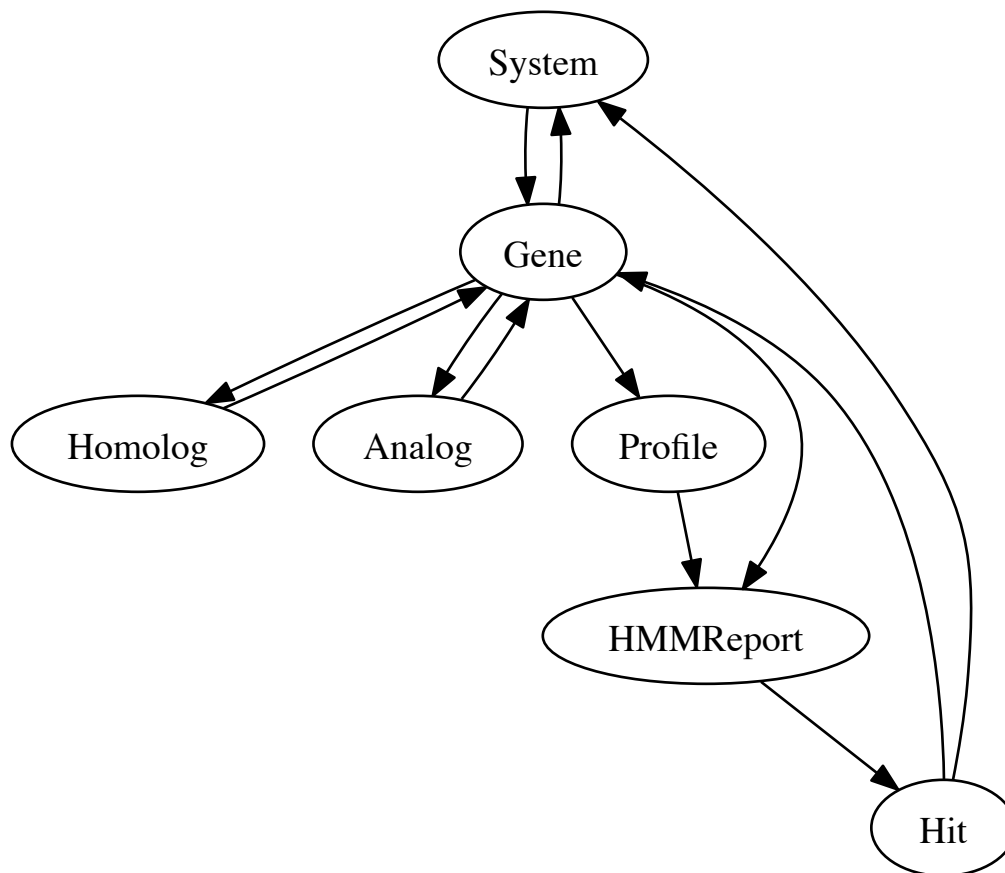

The “*System*” class models the systems to detect and contains a list of instances of the “*Gene*” class, which models each component of a given System. The “*Homolog*” and “*Analog*” classes encapsulate a “*Gene*” and model respectively relationships of homology and analogy between components.

A “*Gene*” represents a component from the System and refers to an instance of the “*Profile*” object that corresponds to an hidden Markov model protein profile (used for sequence similarity search with the Hmmer program).

The “*Config*” class (see the *Configuration API*) handles the program parameters, including Hmmer search parameters, and the set of sequences to query (represented by the “*Database*” object).

The “*Database*” stores information on the dataset, including necessary information to detect systems in both linear and circular chromosomes (see the *Database API*).

A set of parsers and object factories are used to fill the objects from command-line and input files (*i.e.* the optional configuration file and the XML files describing the systems), and to ensure their uniqueness and integrity.

Once these objects are initialized and the detection is launched, Hmmer is executed on the sequences of the database (optionally in parallel) with a unique list of profiles corresponding to the systems to detect. Subsequently, Hmmer output files are parsed, and selected hits (given the search parameters provided) are used to fill “*Hits*” objects, which contain information for the detection of the systems.

During the treatment of the “*Hits*” for “*Systems*” detection, the occurrences of the systems (“*SystemOccurrence*” objects) are filled, and the **decision rules** associated with the systems (quorum and co-localization in the case of an “ordered” dataset) are applied. See the following sections for more details on above objects.

## 7.1 The System object

The *System object* represents a macromolecular system to detect. It is defined *via* a definition file in XML stored in a dedicated location that can be specified *via* the configuration file, or the command-line (*-d* parameter). See *The XML hierarchy* for more details on the XML grammar.

An object *SystemParser* is used to build a system object from its XML definition file.

A system is named after the file name of its XML definition. A system has an attribute *inter\_gene\_max\_space* which is an integer, and three kind of components are listed in function of their presence in the system:

- The genes that must be present in the genome to define this system (“mandatory”).
- The genes that can be present, but do not have to be found in every case (“accessory”).
- The genes that must not be present in the system (“forbidden”).

---

**Note:** a complete description of macromolecular systems modelling is available in the section *Macromolecular systems definition*

---

## 7.2 The Gene object

The *Gene object* represents genes encoding the protein components of a System. Each Gene points out its System of origin (`macsypy.system.System`). A Gene must have a corresponding HMM protein profile. These profiles are represented by Profile objects (`macsypy.gene.Profile`), and must be named after the gene name. For instance, the gene *gspD* will correspond to the “gspD.hmm” profile file. See *The Profile object*. A Gene has several properties described in the *Gene API*.

A Gene may have Homologs or Analogs. An “*Homolog*” (resp. “*Analog*”) object encapsulates a Gene and has a reference to the Gene it is homolog (resp. “*analog*”) to. See the *Homolog API* and *Analog API* for more details.

**Warning:** To optimize computation and to avoid concurrency problems when we search several systems, each gene must be instantiated only once, and stored in a “*gene\_bank*”. `gene_bank` is a `macsypy.gene.GeneBank` object. The `gene_bank` and `system_bank` are filled by the `system_parser` (`macsypy.system_parser.SystemParser`)

## 7.3 The Profile object

Each “*Gene*” component corresponds to a “*Profile*”. The “*Profile*” object is used for the search of the gene with Hmmer. Thus, a “*Profile*” must match a HMM file, which name is based on the profile name. For instance, the *gspG* gene has the corresponding “*gspG.hmm*” profile file provided at a dedicated location.

## 7.4 Reporting Hmmer search results

A “*HMMReport*” (`macsypy.report.HMMReport`) object represents the results of a Hmmer program search on the input dataset with a hidden Markov model protein profile. This object has methods to extract and build “*Hits*” that are then analyzed for systems assessment.

It analyses Hmmer raw outputs, and applies filters on the matches (according to *Hmmer options*). See *Hmmer results outputs* for details on the resulting output files. For profile matches selected with the filtering parameters, “*Hit*” objects are built (see *the Hit API*).



# MACSYFINDER FUNCTIONING

## 8.1 Functioning overview

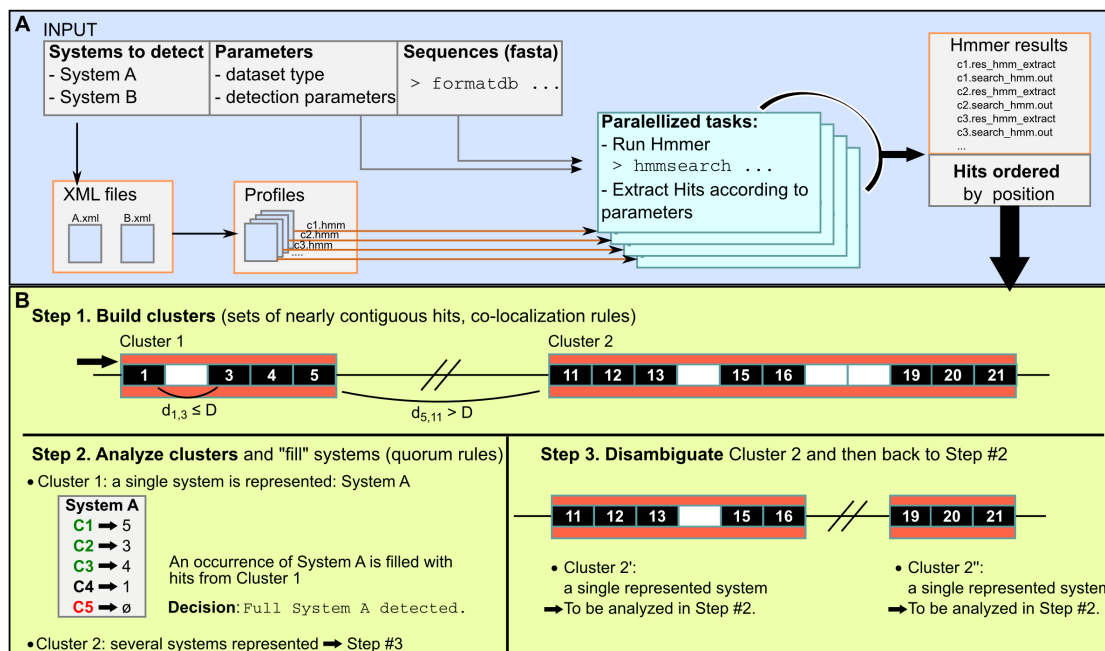

## 8.2 A. Searching for systems' components

MacSyFinder is run from the command-line using a variety of input files and options. See *Input dataset* for more details.

Initially, MacSyFinder **searches for the components** of a system by sequence similarity search.

From the list of systems to detect, a non-redundant list of components to search is built. For each system, the list includes:

- mandatory components
- accessory components
- forbidden components

- homologs and/or analogs of these three types of components in the case they are “exchangeable”

Hmmer is run on the corresponding set of HMM profiles, and the hits are filtered according to criteria defined by the user (see *Hmmer options* and *HMMReport API*). This step, and the extraction of significant hits can be performed in parallel (-w command-line option). See the *Command-line options*, and the *search\_genes API* for more details.

## 8.3 B. Assessing systems presence

The following steps depend on whether the input dataset is *ordered* (complete or nearly complete genome(s)), or *unordered* (metagenomes, or unassembled genome) (see *Input dataset*). In the case of **ordered datasets**, the hits of the previous analysis are used to build *clusters of co-localized genes* as defined in the XML files. These clusters are then scanned to check for the model specifications like minimal quorum of “Mandatory” or “Accessory” genes or the absence of “Forbidden” components. When the gene order is unknown the power of the analysis is more limited. In this case, and depending on the type of dataset, the presence of systems can be suggested only on the basis of the quorum of genes. The results are outputted in a tabular and graphical form (see *Output format*).

### 8.3.1 For ordered datasets:

1. The search starts first with the formation of clusters of contiguous hits (**co-localization criterion**) for each replicon. Two hits are said contiguous if their genomic location is separated by less than D protein-encoding gene, D being the maximum of the parameter “inter\_gene\_max\_space” from the two genes with hits (system-specific, of gene-specific parameter).
2. Clusters are then scanned, and those containing only genes from a single system are kept for further analyses (step 4.), whether those with multiple systems represented are analysed with a disambiguation step (step 3.).
3. The disambiguation step consists in splitting clusters that contains genes from different systems into sub-clusters that contain genes from a single system. Valid sub-clusters are then analysed like other clusters (step 2.). In the complex cases where genes from a same system are scattered into the cluster, then corresponding sub-clusters will not be further analysed for system detection.
4. Valid clusters are used to fill system occurrences (`macsypy.search_systems.SystemOccurence`). In this step, the **quorum** criteria for the system assessment are checked according to the system’s definition. In the case a single locus fills a complete system occurrence, it is stored and reported in the output files (“**single-locus**” occurrence). Otherwise, if the cluster corresponds to a valid but incomplete system, it is stored for inclusion in a scattered system occurrence (“**multi-loci**” occurrence).
5. When all clusters, “loner” genes and “multi\_system” genes were scanned for inclusion in system occurrences, a decision is made for every system occurrence regarding the **quorum rules** defined for the corresponding system.

---

**Note:** When the “multi\_loci” option is turned on, a single “multi-loci” system is assessed per replicon, even if it could correspond to multiple scattered systems. Thus, the “single-locus” systems correspond to a more powerful mode of detection.

**Warning:** Cases where systems are consecutive will be treated, and separate systems will be detected, but complex cases of detection, *i.e.* when systems’ components are intermingled will not be considered.

### 8.3.2 For unordered datasets:

1. The Hits are grouped by system.



2. They are used to fill a single system occurrence (`macsypy.search_systems.SystemOccurence`) per system type.

---

**Note:** The “unordered” mode of detection is less powerful, as a single occurrence of a given system is filled for an entire dataset with hits that origin is unknown. Please consider “systems assessments” with caution in this mode.

---



## **Part III**

# **MacSyFinder API documentation**



# CONFIGURATION API

Options to run MacSyFinder can be specified in a *Configuration file*. The API described below handles all configuration options for MacSyFinder. The Config object provides some default values, and performs some validations of the values.

## 9.1 Config API reference

```
class macsypy.config.Config (cfg_file='', sequence_db=None, db_type=None,
                             replicon_topology=None, topology_file=None, inter_gene_max_space=None,
                             min_mandatory_genes_required=None, min_genes_required=None,
                             max_nb_genes=None, multi_loci=None, hmmer_exe=None,
                             index_db_exe=None, e_value_res=None, i_value_sel=None,
                             coverage_profile=None, def_dir=None, res_search_dir=None,
                             res_search_suffix=None, profile_dir=None, profile_suffix=None,
                             res_extract_suffix=None, log_level=None, log_file=None,
                             worker_nb=None, config_file=None, previous_run=None,
                             build_indexes=None)
```

Parse configuration files and handle the configuration according to the following file location precedence: /etc/macsyfinder/macsyfinder.conf < ~/.macsyfinder/macsyfinder.conf < .macsyfinder.conf

If a configuration file is given on the command-line, this file will be used. *In fine* the arguments passed on the command-line have the highest priority.

```
__init__(cfg_file='', sequence_db=None, db_type=None, replicon_topology=None, topology_file=None,
          inter_gene_max_space=None, min_mandatory_genes_required=None, min_genes_required=None,
          max_nb_genes=None, multi_loci=None, hmmer_exe=None, index_db_exe=None, e_value_res=None,
          i_value_sel=None, coverage_profile=None, def_dir=None, res_search_dir=None,
          res_search_suffix=None, profile_dir=None, profile_suffix=None, res_extract_suffix=None,
          log_level=None, log_file=None, worker_nb=None, config_file=None, previous_run=None,
          build_indexes=None)
```

### Parameters

- **cfg\_file** (*string*) – the path to the MacSyFinder configuration file to use
- **previous\_run** (*string*) – the path to the results directory of a previous run
- **sequence\_db** (*string*) – the path to the sequence input dataset (fasta format)
- **db\_type** (*string*) – the type of dataset to deal with. “unordered\_replicon” corresponds to a non-assembled genome, “unordered” to a metagenomic dataset, “ordered\_replicon” to an assembled genome, and “gembase” to a set of replicons where sequence identifiers follow this convention “>RepliconName\_SequenceID”.

- **replicon\_topology** (*string*) – the topology ('linear' or 'circular') of the replicons. This option is meaningful only if the `db_type` is 'ordered\_replicon' or 'gembase'
- **topology\_file** (*string*) – a tabular file of mapping between replicon names and the corresponding topology (e.g. "RepliconA linear")
- **inter\_gene\_max\_space** (*list of list of 2 elements [[ string system, integer space], ...]*) –
- **min\_mandatory\_genes\_required** (*list of list of 2 elements [[ string system, integer ], ...]*) –
- **min\_genes\_required** (*list of list of 2 elements [[ string system, integer ], ...]*) –
- **max\_nb\_genes** (*list of list of 2 elements [[ string system, integer ], ...]*) –
- **multi\_loci** (*string*) –
- **hmmer\_exe** (*string*) – the Hmmer "hmmsearch" executable
- **index\_db\_exe** (*string*) – the indexer executable ("makeblastdb" or "formatdb")
- **e\_value\_res** (*float*) – maximal e-value for hits to be reported during Hmmer search
- **i\_value\_sel** (*float*) – maximal independent e-value for Hmmer hits to be selected for system detection
- **coverage\_profile** (*float*) – minimal profile coverage required in the hit alignment to allow the hit selection for system detection
- **def\_dir** (*string*) – the path to the directory containing systems definition files (.xml)
- **res\_search\_dir** (*string*) – the path to the directory where to store MacSyFinder search results directories.
- **res\_search\_suffix** (*string*) – the suffix to give to Hmmer raw output files
- **res\_extract\_suffix** (*string*) – the suffix to give to filtered hits output files
- **profile\_dir** (*string*) – path to the profiles directory
- **profile\_suffix** (*string*) – the suffix of profile files. For each 'Gene' element, the corresponding profile is searched in the 'profile\_dir', in a file which name is based on the Gene name + the profile suffix.
- **log\_level** (*int*) – the level of log output
- **log\_file** (*string*) – the path to the directory to write MacSyFinder log files
- **worker\_nb** (*int*) – maximal number of processes to be used in parallel (multi-thread run, 0 use all cores available)
- **build\_indexes** (*boolean*) – build the indexes from the sequence dataset in fasta format

**\_\_weakref\_\_**

list of weak references to the object (if defined)

**\_\_validate** (*cmde\_line\_opt, cmde\_line\_values*)

Get all configuration values and check the validity of their values. Create the working directory

#### Parameters

- **cmde\_line\_opt** (*dict, all values are cast in string*) – the options from the command line
- **cmde\_line\_values** (*dict, values are not cast*) – the options from the command line

**Returns** all the options for this execution

**Return type** dictionary

**build\_indexes**

**Returns** True if the indexes must be rebuilt, False otherwise

**Return type** boolean

**coverage\_profile**

**Returns** the coverage threshold used to select a hit for systems detection and for the Hmmer report (filtered hits)

**Return type** float

**db\_type**

**Returns** the type of the input sequence dataset. The allowed values are : 'unordered\_replicon', 'ordered\_replicon', 'gembase', 'unordered'

**Return type** string

**def\_dir**

**Returns** the path to the directory where are stored definitions of secretion systems (.xml files)

**Return type** string

**e\_value\_res**

**Returns** The e\_value threshold used by Hmmer to report hits in the Hmmer raw output file

**Return type** float

**hmmer\_dir**

**Returns** the name of the directory where the hmmer results are stored

**Return type** string

**hmmer\_exe**

**Returns** the name of the binary to execute for homology search from HMM protein profiles (Hmmer)

**Return type** string

**i\_evalue\_sel**

**Returns** the i\_evalue threshold used to select a hit for systems detection and for the Hmmer report (filtered hits)

**Return type** float

**index\_db\_exe**

**Returns** the name of the binary to index the input sequences dataset for Hmmer

**Return type** string

**inter\_gene\_max\_space** (*system*)

**Parameters** *system* (*string*) – the name of a system

**Returns** the maximum number of components with no match allowed between two genes with a match to consider them contiguous (at the system level)

**Return type** integer

**max\_nb\_genes** (*system*)

**Parameters** *system* (*string*) – the name of a system

**Returns** the maximum number of genes to assess the system presence

**Return type** integer

**min\_genes\_required** (*system*)

**Parameters** **system** (*string*) – the name of a system

**Returns** the genes (mandatory+accessory) quorum to assess the system presence

**Return type** integer

**min\_mandatory\_genes\_required** (*system*)

**Parameters** **system** (*string*) – the name of a system

**Returns** the mandatory genes quorum to assess the system presence

**Return type** integer

**multi\_loci** (*system*)

**Parameters** **system** (*string*) – the name of a system

**Returns** the genes (mandatory+accessory) quorum to assess the system presence

**Return type** boolean

**previous\_run**

**Returns** the path to the previous run directory to use (to recover Hmmer raw output)

**Return type** string

**profile\_dir**

**Returns** the path to the directory where are the HMM protein profiles which corresponds to Gene

**Return type** string

**profile\_suffix**

**Returns** the suffix for profile files

**Return type** string

**replicon\_topology**

**Returns** the topology of the replicons. Two values are supported 'linear' (default) and circular. Only relevant for 'ordered' datasets

**Return type** string

**res\_extract\_suffix**

**Returns** the suffix of extract files (tabulated files after HMM output parsing and filtering of hits)

**Return type** string

**res\_search\_dir**

:return the path to the directory to store results of MacSyFinder runs :rtype: string

**res\_search\_suffix**

**Returns** the suffix for Hmmer raw output files

**Return type** string



**save** (*dir\_path*)

save the configuration used for this run in the ini format file

**sequence\_db**

**Returns** the path to the input sequence dataset (in fasta format)

**Return type** string

**topology\_file**

**Returns** the path to the file of replicons topology.

**Return type** string

**worker\_nb**

**Returns** the maximum number of parallel jobs

**Return type** int

**working\_dir**

**Returns** the path to the working directory to use for this run

**Rtpe** string



# DATABASE API

The “database” object handles the indexes of the sequence dataset in fasta format, and other useful information on the input dataset.

MacSyFinder needs several indexes to run, and speed up the analyses.

- index for hmmsearch (Hmmer program)
- index for MacSyFinder

hmmsearch needs to index the sequences to speed up the analyses. The indexes are built by the external tools *formatdb* (<ftp://ftp.ncbi.nlm.nih.gov/blast/executables/release/LATEST/ncbi.tar.gz>) or *makeblastdb*. MacSyFinder tries to find *formatdb* indexes in the same directory as the sequence file. If the indexes are present MacSyFinder uses these index, otherwise it builds these indexes using *formatdb* or *makeblastdb*.

MacSyFinder needs also to have the length of each sequence and its position in the database to compute some statistics on Hmmer hits. Thus it also builds an index (with *.idx* suffix) that is stored in the same directory as the sequence dataset. If this file is found in the same folder than the input dataset, MacSyFinder will use it. Otherwise, it will build it.

The user can force MacSyFinder to rebuild these indexes with the “*-idx*” option on the command-line.

Additionally, for ordered datasets ( *db\_type* = ‘*gembase*’ or ‘*ordered\_replicon*’ ), MacSyFinder builds an internal “database” from these indexes to store information about replicons, their begin and end positions, and their topology. The begin and end positions of each replicon are computed from the sequence file, and the topology from the parsing of the topology file (*-topology-file*, see *Topology files*).

## 10.1 database API reference

**class** `macsypy.database.Indexes` (*cfg*)

Handle the indexes for macsyfinder:

- find the indexes for hmmer, or build them using *formatdb* or *makeblastdb* external tools
- find the indexes required by macsyfinder to compute some scores, or build them.

**\_\_init\_\_** (*cfg*)

The constructor retrieves the file of indexes in the case they are not present or the user asked for build indexes (*-idx*) Launch the indexes building.

**Parameters** *cfg* (`macsypy.config.Config` object) – the configuration

**\_\_weakref\_\_**

list of weak references to the object (if defined)

`__build_hmmer_indexes()`

build the index files for hmmer using the formatdb or makeblastdb tool

`__build_my_indexes()`

Build macsyfinder indexes. These indexes are stored in a file.

**The file format is the following:**

- one entry per line, with each line having this format:
- sequence id;sequence length;sequence rank

`build(force=False)`

Build the indexes from the sequence dataset in fasta format

**Parameters** `force` (*boolean*) – If True, force the index building even if the index files are present in the sequence dataset folder

`find_hmmer_indexes()`

**Returns** The hmmer index files. If indexes are inconsistent (some file(s) missing), a Runtime Error is raised

**Return type** list of string

`find_my_indexes()`

**Returns** the file of macsyfinder indexes if it exists in the dataset folder, None otherwise.

**Return type** string

`class macsyphy.database.RepliconDB(cfg)`

Stores information (topology, min, max, [genes]) for all replicons in the sequence\_db the Replicon object must be instantiated only for sequence\_db of type 'gembase' or 'ordered\_replicon'

`__contains__(replicon_name)`

**Parameters** `replicon_name` (*string*) – the name of the replicon

**Returns** True if replicon\_name is in the repliconDB, false otherwise.

**Return type** boolean

`__getitem__(replicon_name)`

**Parameters** `replicon_name` (*string*) – the name of the replicon to get information on

**Returns** the RepliconInfo for the provided replicon\_name

**Return type** `RepliconInfo` object

**Raise** `KeyError` if replicon\_name is not in repliconDB

`__init__(cfg)`

**Parameters** `cfg` (`macsyphy.config.Config` object) – The configuration object

---

**Note:** This class can be instantiated only if the db\_type is 'gembase' or 'ordered\_replicon'

---

`__weakref__`

list of weak references to the object (if defined)

`__fill_gembase_min_max(topology, default_topology)`

For each replicon\_name of a gembase dataset, it fills the internal dictionary with a namedtuple RepliconInfo

**Parameters**

- **topology** (*dict*) – the topologies for each replicon (parsed from the file specified with the option `-topology-file`)
- **default\_topology** (*string*) – the topology provided by the `config.replicon_topology`

**`_fill_ordered_min_max`** (*default\_topology=None*)

For the `replicon_name` of the `ordered_replicon` sequence base, fill the internal dict with `RepliconInfo`

**Parameters** **default\_topology** (*string*) – the topology provided by `config.replicon_topology`

**`_fill_topology`** ()

Fill the internal dictionary with min and max positions for each `replicon_name` of the `sequence_db`

**`get`** (*replicon\_name, default=None*)

**Parameters**

- **replicon\_name** (*string*) – the name of the replicon to get informations
- **default** (*any*) – the value to return if the `replicon_name` is not in the `RepliconDB`

**Returns** the `RepliconInfo` for `replicon_name` if `replicon_name` is in the `repliconDB`, else default. If default is not given, it is set to `None`, so that this method never raises a `KeyError`.

**Return type** `RepliconInfo` object

**`items`** ()

**Returns** a copy of the `RepliconDB` as a list of (`replicon_name`, `RepliconInfo`) pairs

**`iteritems`** ()

**Returns** an iterator over the `RepliconDB` as a list (`replicon_name`, `RepliconInfo`) pairs

**`replicon_infos`** ()

**Returns** a copy of the `RepliconDB` as list of replicons info

**Return type** `RepliconInfo` instance

**`replicon_names`** ()

**Returns** a copy of the `RepliconDB` as a list of `replicon_names`

**class** `macsypy.database.RepliconInfo`

`RepliconInfo(topology, min, max, genes)`

**`__getnewargs__`** ()

Return self as a plain tuple. Used by copy and pickle.

**static `__new__`** (*\_cls, topology, min, max, genes*)

Create new instance of `RepliconInfo(topology, min, max, genes)`

**`__repr__`** ()

Return a nicely formatted representation string

**`_asdict`** ()

Return a new `OrderedDict` which maps field names to their values

**classmethod `_make`** (*iterable, new=<built-in method \_\_new\_\_ of type object at 0x10cacd840>, len=<built-in function len>*)

Make a new `RepliconInfo` object from a sequence or iterable

**`_replace`** (*\_self, \*\*kwds*)

Return a new `RepliconInfo` object replacing specified fields with new values

**genes**

Alias for field number 3

**max**

Alias for field number 2

**min**

Alias for field number 1

**topology**

Alias for field number 0

`macsypy.database.fasta_iter` (*fasta\_file*)

**Parameters** `fasta_file` (*file object*) – the file containing all input sequences in fasta format.

**Author** <http://biostar.stackexchange.com/users/36/brentp>

**Returns** for a given fasta file, it returns an iterator which yields tuples (string id, string comment, int sequence length)

**Return type** iterator

# SYSTEM API

It represents a macromolecular system to detect. See *The System object* for an overview of its implementation.

---

**Note:** a complete description of macromolecular systems modelling is available in the section *Macromolecular systems definition*

---

## 11.1 SystemBank API reference

### **class** `macsypy.system.SystemBank`

Build and store all Systems objects. Systems must not be instantiated directly. This system factory must be used. It ensures there is a unique instance of a system for a given system name. To get a system, use the method `__getitem__` via the “[ ]”. If the System is already cached in the SystemBank, it is returned. Otherwise a new system is built, stored and then returned.

`__contains__` (*system*)

Implement the membership test operator

**Parameters** `system` (`macsypy.system.System` object) – the system to test

**Returns** True if the system is in the System factory, False otherwise

**Return type** boolean

`__getitem__` (*name*)

**Parameters** `name` (*string*) – the name of the system

**Returns** the system corresponding to the name. If the system already exists, return it, otherwise build it and return it.

**Return type** `macsypy.system.System` object

`__iter__` ()

Return an iterator object on the systems contained in the bank

`__len__` ()

**Returns** the number of systems stored in the bank

**Return type** integer

`__weakref__`

list of weak references to the object (if defined)

`add_system` (*system*)

**Parameters** `system` (`macsypy.system.System` object) – the system to add

**Raise** `KeyError` if a system with the same name is already registered.

---

**Note:** Don't instantiate your own SystemBank use the `system_bank` at the top level of the module.

---

```
from macsypy.system import system_bank
```

---

## 11.2 System API reference

```
class macsypy.system.System(cfg, name, inter_gene_max_space, min_mandatory_genes_required=None,  
                           min_genes_required=None, max_nb_genes=None, multi_loci=False)
```

Handle a secretion system.

```
__init__(cfg, name, inter_gene_max_space, min_mandatory_genes_required=None,  
         min_genes_required=None, max_nb_genes=None, multi_loci=False)
```

### Parameters

- **cfg** (`macsypy.config.Config` object) – the configuration object
- **name** (*string*) – the name of the system
- **inter\_gene\_max\_space** (*integer*) – the maximum distance between two genes (**co-localization** parameter)
- **min\_mandatory\_genes\_required** (*integer*) – the quorum of mandatory genes to define this system
- **min\_genes\_required** (*integer*) – the quorum of genes to define this system
- **max\_nb\_genes** (*integer*) –
- **multi\_loci** (*boolean*) –

```
__weakref__
```

list of weak references to the object (if defined)

```
accessory_genes
```

**Returns** the list of genes that are allowed in this secretion system

**Return type** list of `macsypy.gene.Gene` objects

```
add_accessory_gene(gene)
```

Add a gene to the list of accessory genes

**Parameters** **gene** (`macsypy.gene.Gene` object) – gene that is allowed to be present in this system

```
add_forbidden_gene(gene)
```

Add a gene to the list of forbidden genes

**Parameters** **gene** (`macsypy.gene.Gene` object) – gene that must not be found in this system

```
add_mandatory_gene(gene)
```

Add a gene to the list of mandatory genes

**Parameters** **gene** (`macsypy.gene.Gene` object) – gene that is mandatory for this system

```
forbidden_genes
```

**Returns** the list of genes that are forbidden in this secretion system

**Return type** list of `macsypy.gene.Gene` objects

```
get_gene(gene_name)
```



**Parameters** `gene_name` (*string*) – the name of the gene to get

**Returns** the gene corresponding to `gene_name`.

**Return type** a `macsypy.gene.Gene` object.

**Raise** `KeyError` the system does not contain any gene with name `gene_name`.

**get\_gene\_ref** (*gene*)

**Parameters** `gene` (a `macsypy.gene.Gene` or `macsypy.gene.Homolog` or `macsypy.gene.Analog` object.) – the gene to get the gene reference.

**Returns** the gene reference of the gene if exists (if the gene is an `Homolog` or an `Analog`), otherwise return `None`.

**Return type** `macsypy.gene.Gene` object or `None`

**Raise** `KeyError` if gene is not in the system

**inter\_gene\_max\_space**

**Returns** set the maximum distance allowed between 2 genes for this system

**Return type** integer

**mandatory\_genes**

**Returns** the list of genes that are mandatory in this secretion system

**Return type** list of `macsypy.gene.Gene` objects

**max\_nb\_genes**

**Returns** the maximum number of genes to assess the system presence.

**Return type** int (or `None`)

**min\_genes\_required**

**Returns** get the minimum number of genes to assess for the system presence.

**Return type** integer

**min\_mandatory\_genes\_required**

**Returns** get the quorum of mandatory genes required for this system

**Return type** integer

**multi\_loci**

**Returns** True if the system is authorized to be inferred from multiple loci, False otherwise

**Return type** boolean



# THE PARSER OF SYSTEMS DEFINITIONS

The system parser object “SystemParser” instantiates Systems and Genes objects from XML system definitions (see *Macromolecular systems definition*). The parsing consists in three phases.

Phase 1.

- each Gene is parsed from the System it is defined
- From the list of System to detect, the list of Systems to parse is established

Phase 2.

- For each system to parse
  - create the System
  - add this System to the system\_bank
  - create the Genes defined in this System with their attributes but not their Homologs
  - add these Genes in the gene\_bank

Phase 3.

- For each System to search
  - For each Gene defined in this System:
    - \* create the Homologs by encapsulating Genes from the gene\_bank
    - \* add the Gene to the System

For instance:

```
Syst_1
<system inter_gene_max_space="10">
  <gene name="A" mandatory="1" loner="1">
    <homologs>
      <gene name="B" sys_ref="Syst_2">
    </homologs>
  </gene>
</system>
```

```
Syst_2
<system inter_gene_max_space="15">
  <gene name="B" mandatory="1">
    <homologs>
```

```
        <gene name="B" sys_ref="Syst_1"
        <gene name="C" sys_ref="Syst_3">
    </homologs>
</gene>
<system>

Syst_3
<system inter_gene_max_space="20">
    <gene name="c" mandatory="1" />
</system>
```

With the example above:

- the Syst\_1 has a gene\_A
- the gene\_A has homolog gene\_B
- the gene\_B has a reference to Syst\_2
- gene\_B attributes from the Syst\_2 are used to build the Gene
- the Syst\_2 has attributes as defined in the corresponding XML file (inter\_gene\_max\_space ,...)

Contrariwise:

- the gene\_B has no Homologs
- the Syst\_2 has no Genes

---

**Note:** The only “full” Systems (*i.e.*, with all corresponding Genes created) are those to detect.

---

## 12.1 SystemParser API reference

**class** `macsypy.system_parser.SystemParser` (*cfg, system\_bank, gene\_bank*)

Build a System instance from the corresponding System definition described in the XML file (named after the system’s name) found at the dedicated location (“-d” command-line option).

`__init__` (*cfg, system\_bank, gene\_bank*)  
Constructor

### Parameters

- `cfg` (`macsypy.config.Config` object) – the configuration object of this run
- `system_bank` (`macsypy.system.SystemBank` object) – the system factory
- `gene_bank` (`macsypy.gene.GeneBank` object) – the gene factory

`__weakref__`  
list of weak references to the object (if defined)

`_create_genes` (*system, system\_node*)

Create genes belonging to the systems. Be careful, the returned genes have not their homologs/analogs set yet.

### Parameters

- `system` (`macsypy.system.System` object) – the System currently parsing
- `system_node` (`:class"ET.ElementTree` object) – the element gene

**Returns** a list of the genes belonging to the system.

**Return type** [`macsypy.gene.Gene`, ...]

`_create_system` (*system\_name*, *system\_node*)

**Parameters**

- **system\_name** – the name of the system to create. This name must match a XML file in the definition directory (“-d” option in the command-line)
- **system\_node** (:class”`ET.ElementTree` object.) – the node corresponding to the system.

**Returns** the system corresponding to the name.

**Return type** `macsypy.system.System` object.

`_fill` (*system*, *system\_node*)

Fill the system with genes found in this system definition. Add homologs to the genes if necessary.

**Parameters**

- **system** (`macsypy.system.System` object) – the system to fill
- **system\_node** (:class”`ET.ElementTree` object) – the “node” in the XML hierarchy corresponding to the system

`_parse_analog` (*node*, *gene\_ref*, *curr\_system*)

Parse a xml element gene and build the corresponding object

**Parameters**

- **node** (`xml.etree.ElementTree.Element` object.) – a “node” corresponding to the gene element in the XML hierarchy
- **gene\_ref** (class:`macsypy.gene.Gene` object.) – the gene which this gene is homolog to

**Returns** the gene object corresponding to the node

**Return type** `macsypy.gene.Analog` object

`_parse_homolog` (*node*, *gene\_ref*, *curr\_system*)

Parse a xml element gene and build the corresponding object

**Parameters**

- **node** (`xml.etree.ElementTree.Element` object.) – a “node” corresponding to the gene element in the XML hierarchy
- **gene\_ref** (class:`macsypy.gene.Gene` object) – the gene which this gene is homolog to

**Returns** the gene object corresponding to the node

**Return type** `macsypy.gene.Homolog` object

`check_consistency` (*systems*)

Check the consistency of the co-localization features between the different values given as an input: between XML definitions, configuration file, and command-line options.

**Parameters** **systems** (list of class:`txssnalib.system.System` object) – the list of systems to check

**Raise** `macsypy.macsypy_error.SystemInconsistencyError` if one test fails

(see [feature](#))

In the different possible situations, different requirements need to be fulfilled (“mandatory\_genes” and “accessory\_genes” consist of lists of genes defined as such in the system definition):

- If:** min\_mandatory\_genes\_required = None ; min\_genes\_required = None
- Then:** min\_mandatory\_genes\_required = min\_genes\_required = len(mandatory\_genes)

*always True by Systems design*

- If:** min\_mandatory\_genes\_required = value ; min\_genes\_required = None
- Then:** min\_mandatory\_genes\_required <= len(mandatory\_genes)
- AND** min\_genes\_required = min\_mandatory\_genes\_required

*always True by design*

- If:** min\_mandatory\_genes\_required = None ; min\_genes\_required = Value
- Then:** min\_mandatory\_genes\_required = len(mandatory\_genes)
- AND** min\_genes\_required >= min\_mandatory\_genes\_required
- AND** min\_genes\_required <= len(mandatory\_genes+accessory\_genes)

*to be checked*

- If:** min\_mandatory\_genes\_required = Value ; min\_genes\_required = Value
- Then:** min\_genes\_required <= len(accessory\_genes+mandatory\_genes)
- AND** min\_genes\_required >= min\_mandatory\_genes\_required
- AND** min\_mandatory\_genes\_required <= len(mandatory\_genes)

*to be checked*

**parse** (*systems\_2\_detect*)

Parse systems definition in XML format to build the corresponding system objects, and add them to the system factory after checking its consistency. To get the system ask it to system\_bank :param systems\_2\_detect: a list with the names of the systems to parse :type systems\_2\_detect: list of string

**system\_to\_parse** (*sys\_2\_parse, parsed\_systems*)

**Parameters** *sys\_2\_parse* ([string, ...]) – the list of systems to parse

**Returns** the list of systems' names to parse. Scan the whole chain of 'system\_ref' in a recursive way.

**Return type** [string, ...]

# GENE API

The Gene object represents genes encoding the protein components of a System. See *The Gene object* for an overview of the implementation.

**Warning:** To optimize computation and to avoid concurrency problems when we search several systems, each gene must be instantiated only once, and stored in `gene_bank`. `gene_bank` is a `macsypy.gene.GeneBank` object. The `gene_bank` and `system_bank` (`macsypy.system.SystemBank` object) are filled by a `system_parser` (`macsypy.system_parser.SystemParser`)

Example to get a gene object:

```
from macsypy.system import system_bank
from macsypy.config import Config
from macsypy.gene import gene_bank

#get a system
t2ss = system_bank["T2SS"]

#get of a gene
pilo = gene_bank["pilo"]
```

## 13.1 GeneBank API reference

**class** `macsypy.gene.GeneBank`

Store all Gene objects. Ensure that genes are instantiated only once.

**\_\_contains\_\_** (*gene*)

Implement the membership test operator

**Parameters** `gene` (`macsypy.gene.Gene` object) – the gene to test

**Returns** True if the gene is in, False otherwise

**Return type** boolean

**\_\_getitem\_\_** (*name*)

**Parameters**

• **name** (*string*) – the name of the Gene

• **cfg** (`macsypy.config.Config` object) – the configuration object

**Returns** return the Gene corresponding to the name. If the Gene already exists, return it, otherwise, build it and return it

**Return type** `macsypy.gene.Gene` object

`__iter__()`  
Return an iterator object on the genes contained in the bank

`__weakref__`  
list of weak references to the object (if defined)

`add_gene(gene)`  
**Parameters**

- **name** (*string*) – the name of the gene
- **cfg** (`macsypy.config.Config` object) – the configuration

**Returns** return gene corresponding to the name. If the gene already exists, return it, otherwise, build it and return it

**Return type** `macsypy.gene.Gene` object

**Raise** `KeyError` if a gene with the same name is already registered

---

**Note:** Don't instantiate your own GeneFactory use the `gene_bank` at the top level of the module.

```
from macsypy.gene import gene_bank
```

---

## 13.2 Gene API reference

`class macsypy.gene.Gene(cfg, name, system, profiles_registry, loner=False, exchangeable=False, multi_system=False, inter_gene_max_space=None)`

Handle Gene of a (secretion) System

`__eq__(gene)`

**Returns** True if the gene names (`gene.name`) are the same, False otherwise.

**Parameters** **gene** (`macsypy.gene.Gene` object.) – the query of the test

**Return type** boolean.

`__init__(cfg, name, system, profiles_registry, loner=False, exchangeable=False, multi_system=False, inter_gene_max_space=None)`

handle gene

**Parameters**

- **cfg** (`macsypy.config.Config` object) – the configuration object.
- **name** (*string.*) – the name of the Gene.
- **system** (`macsypy.system.System` object.) – the system that owns this Gene
- **profiles\_registry** (`macsypy.registries.ProfilesRegistry` object.) – where all the paths profiles where register.
- **loner** (*boolean.*) – True if the Gene can be isolated on the genome (with no contiguous genes), False otherwise.
- **exchangeable** (*boolean.*) – True if this Gene can be replaced with one of its homologs or analogs without any effects on the system assessment, False otherwise.
- **multi\_system** (*boolean.*) – True if this Gene can belong to different occurrences of this System.
- **inter\_gene\_max\_space** (*integer*) – the maximum space between this Gene and another gene of the System.



`__str__()`

Print the name of the gene and of its homologs/analogs.

`__weakref__`

list of weak references to the object (if defined)

`add_analog(analog)`

Add an analogous gene to the Gene

**Parameters** `analog` (`macsypy.gene.Analog` object) – analog to add

`add_homolog(homolog)`

Add a homolog gene to the Gene

**Parameters** `homolog` (`macsypy.gene.Homolog` object) – homolog to add

`exchangeable`

**Returns** True if this gene can be replaced with one of its homologs or analogs without any effects on the system, False otherwise.

**Return type** boolean.

`get_analogs()`

**Returns** the Gene analogs

**Type** list of `macsypy.gene.Analog` object

`get_compatible_systems(system_list, include_forbidden=True)`

Test every system in `system_list` for compatibility with the gene using the `is_authorized` function.

**Parameters**

- **system\_list** (*list of strings*) – a list of system names to test
- **include\_forbidden** (*boolean*) – tells if forbidden genes should be considered as defining a compatible systems or not

**Returns** the list of compatible systems

**Return type** list of string, or void list if none compatible

`get_homologs()`

**Returns** the Gene homologs

**Type** list of `macsypy.gene.Homolog` object

`inter_gene_max_space`

**Returns** The maximum distance allowed between this gene and another gene for them to be considered co-localized. If the value is not set at the Gene level, return the value set at the System level.

**Return type** integer.

`is_accessory(system)`

**Returns** True if the gene is within the *accessory* genes of the system, False otherwise.

**Parameters** `system` (`macsypy.system.System` object.) – the query of the test

**Return type** boolean.

`is_analog(gene)`

**Returns** True if the two genes are analogs, False otherwise.

**Parameters** `gene` (`macsypy.gene.Gene` object.) – the query of the test

**Return type** boolean.

**is\_authorized** (`system`, `include_forbidden=True`)

**Returns** True if the genes are found in the System definition file (.xml), False otherwise.

**Parameters**

- **system** (`macsypy.system.System` object.) – the query of the test
- **include\_forbidden** (`boolean`) – tells if forbidden genes should be considered as “authorized” or not

**Return type** boolean.

**is\_forbidden** (`system`)

**Returns** True if the gene is within the *forbidden* genes of the system, False otherwise.

**Parameters** `system` (`macsypy.system.System` object.) – the query of the test

**Return type** boolean.

**is\_homolog** (`gene`)

**Returns** True if the two genes are homologs, False otherwise.

**Parameters** `gene` (`macsypy.gene.Gene` object.) – the query of the test

**Return type** boolean.

**is\_mandatory** (`system`)

**Returns** True if the gene is within the *mandatory* genes of the system, False otherwise.

**Parameters** `system` (`macsypy.system.System` object.) – the query of the test

**Return type** boolean.

**loner**

**Returns** True if the gene can be isolated on the genome, False otherwise

**Return type** boolean

**multi\_system**

**Returns** True if this Gene can belong to different occurrences of **this System** (and can be used for multiple System assessments), False otherwise.

**Return type** boolean.

**profile = None**

**Variables** `profile` – The HMM protein Profile corresponding to this gene  
`macsypy.gene.Profile` object

**system**

**Returns** the System that owns this Gene

**Return type** `macsypy.system.System` object

---

**Note:** All attributes/methods which are not directly implemented in Homolog are redirected to that of the encapsulated Gene.

---

## 13.3 Homolog API reference

**class** `macsypy.gene.Homolog` (*gene*, *gene\_ref*, *aligned=False*)

Handle homologs, encapsulate a Gene

`__init__` (*gene*, *gene\_ref*, *aligned=False*)

### Parameters

- **gene** (`macsypy.gene.Gene` object.) – the gene
- **gene\_ref** (`macsypy.gene.Gene` object.) – the gene to which the current is homolog.
- **aligned** (*boolean*) – if True, the profile of this gene overlaps totally the sequence of the reference gene profile. Otherwise, only partial overlapping between the profiles.

`__weakref__`

list of weak references to the object (if defined)

**gene** = None

**Variables** **gene** – gene

**gene\_ref**

**Returns** the gene to which this one is homolog to (reference gene)

**Return type** `macsypy.gene.Gene` object

**is\_aligned** ()

**Returns** True if this gene homolog is aligned to its homolog, False otherwise.

**Return type** boolean

## 13.4 Analog API reference

**class** `macsypy.gene.Analog` (*gene*, *gene\_ref*)

Handle analogs, encapsulate a Gene

`__init__` (*gene*, *gene\_ref*)

### Parameters

- **gene** (`macsypy.gene.Gene` object.) – the gene
- **gene\_ref** (`macsypy.gene.Gene` object.) – the gene to which the current is analog.

`__weakref__`

list of weak references to the object (if defined)

**gene** = None

**Variables** **gene** – gene

**gene\_ref**

**Returns** the gene to which this one is analog to (reference gene)

**Return type** `macsypy.gene.Gene` object



# PROFILE API

The *Profile object* is used for the search of the gene with Hmmer. A “*Profile*” must match a HMM protein profile file, which name is based on the profile name. For instance, the *gspG* gene has the corresponding “*gspG.hmm*” profile file provided at a dedicated location.

## 14.1 ProfileFactory API reference

**class** `macsypy.gene.ProfileFactory`

Build and store all Profile objects. Profiles must not be instantiated directly. The `profile_factory` must be used. The `profile_factory` ensures there is only one instance of profile for a given name. To get a profile, use the method `get_profile`. If the profile is already cached, this instance is returned. Otherwise a new profile is built, stored in the `profile_factory` and then returned.

**get\_profile** (`gene, cfg, profiles_registry`)

**Parameters**

- **gene** (`macsypy.gene.Gene` or `macsypy.gene.Homolog` or `macsypy.gene.Analog` object) – the gene associated to this profile
- **profiles\_registry** (*the registry of profiles*) – the registry where are stored the path of the profiles
- **profiles\_registry** – `macsypy.registries.ProfilesRegistry` instance.

**Returns** the profile corresponding to the name. If the profile already exists, return it. Otherwise build it, store it and return it.

**Return type** `macsypy.gene.Profile` object

## 14.2 Profile API reference

**class** `macsypy.gene.Profile` (`gene, cfg, path`)

Handle a HMM protein profile

**\_\_init\_\_** (`gene, cfg, path`)

**Parameters**

- **gene** – the gene corresponding to this profile
- **cfg** (`macsypy.config.Config` object) – the configuration
- **path** (*string*) – the path to the hmm profile.

**\_\_len\_\_** ()

**Returns** the length of the HMM protein profile

**Return type** int

**\_\_str\_\_** ()

Print the name of the corresponding gene and the path to the HMM profile.

**\_\_weakref\_\_**

list of weak references to the object (if defined)

**\_len** ()

Parse the HMM profile file to get and store the length. This private method is called at the Profile init.

**execute** ()

Launch the Hmmer search (hmmsearch executable) with this profile

**Returns** an object storing information on the results of the HMM search (HMMReport)

**Return type** `macsypy.report.HMMReport` object

# HMMREPORT API

A “*HMMReport*” object represents the results of a Hmmer program search on a dataset with a hidden Markov model protein profile (see [this section](#)). This object has methods to extract and filter Hmmer raw outputs (see [generated output files](#)), and then build Hits relevant for system detection. For matches selected with the filtering parameters, “*Hit*” objects (`macsypy.HMMReport.Hit`) are built.

## 15.1 HMMReport API reference

**class** `macsypy.report.HMMReport` (*gene*, *hmmer\_output*, *cfg*)

Handle the results from the HMM search. Extract a synthetic report from the raw hmmer output, after having applied a hit filtering. This class is an **abstract class**. There are two implementations of this abstract class depending on whether the input sequence dataset is “ordered” (“*gembase*” or “*ordered\_replicon*” *db\_type*) or not (“*unordered*” or “*unordered\_replicon*” *db\_type*).

`__init__` (*gene*, *hmmer\_output*, *cfg*)

### Parameters

- **gene** (`macsypy.gene.Gene` object) – the gene corresponding to the profile search reported here
- **hmmer\_output** (*string*) – The path to the raw Hmmer output file
- **cfg** (`macsypy.config.Config` object) – the configuration object

`__metaclass__`

alias of ABCMeta

`__str__` ()

Print information on filtered hits

`__weakref__`

list of weak references to the object (if defined)

`__build_my_db` (*hmm\_output*)

Build the keys of a dictionary object to store sequence identifiers of hits.

**Parameters** **hmm\_output** (*string*) – the path to the hmmsearch output to parse.

**Returns** a dictionary containing a key for each sequence id of the hits

**Return type** dict

`__fill_my_db` (*macsfinder\_idx*, *db*)

Fill the dictionary with information on the matched sequences

**Parameters**

- **macsyfinder\_idx** (*string*) – the path the macsyfinder index corresponding to the dataset
- **db** (*dict*) – the database containing all sequence id of the hits.

**\_hit\_start** (*line*)**Parameters** **line** (*string*) – the line to parse**Returns** True if it's the beginning of a new hit in Hmmer raw output files. False otherwise**Return type** boolean.**\_parse\_hmm\_body** (*hit\_id, gene\_profile\_lg, seq\_lg, coverage\_treshold, replicon\_name, position\_hit, i\_value\_sel, b\_grp*)

Parse the raw Hmmer output to extract the hits, and filter them with threshold criteria selected (“coverage\_profile” and “i\_value\_select” command-line parameters)

**Parameters**

- **hit\_id** (*string*) – the sequence identifier
- **gene\_profile\_lg** (*integer*) – the length of the profile matched
- **seq\_lg** (*integer*) – the length of the sequence
- **coverage\_treshold** (*float*) – the minimal coverage of the profile to be reached in the Hmmer alignment for hit selection
- **replicon\_name** (*string*) – the identifier of the replicon
- **position\_hit** (*integer*) – the rank of the sequence matched in the input dataset file
- **i\_value\_sel** (*float*) – the maximal i-value (independent value) for hit selection
- **b\_grp** (*list of list of strings*) – the Hmmer output lines to deal with (grouped by hit)

**Returns** a set of hits**Return type** list of `macsypy.report.Hit` objects**\_parse\_hmm\_header** (*h\_grp*)**Parameters** **h\_grp** (*sequence of string*) – the sequence of string return by groupby function representing the header of a hit**Returns** the sequence identifier from a set of lines that corresponds to a single hit**Return type** string**best\_hit** ()

Return the best hit among multiple hits

**extract** ()Parse the raw Hmmer output file and produce a new synthetic report file by applying a filter on hits. Contain selected and sorted hits ( **this abstract method is implemented in inherited classes** )**save\_extract** ()

Write the string representation of the exact report in a file. The name of this file is the concatenation of the gene name and of the “res\_extract\_suffix” from the config object



## 15.2 GeneralHMMReport API reference

**class** `macsypy.report.GeneralHMMReport` (*gene, hmmer\_output, cfg*)

Handle HMM report. Extract a synthetic report from the raw hmmer output. Dedicated to any type of ‘unordered’ datasets.

**extract** ()

Parse the output file of hmmer compute from an unordered genes base and produced a new synthetic report file.

## 15.3 OrderedHMMReport

**class** `macsypy.report.OrderedHMMReport` (*gene, hmmer\_output, cfg*)

Handle HMM report. Extract a synthetic report from the raw hmmer output. Dedicated to ‘ordered\_replicon’ datasets.

**extract** ()

Parse the output file of Hmmer obtained from a search in an ordered set of sequences and produce a new synthetic report file.

## 15.4 GembaseHMMReport

**class** `macsypy.report.GembaseHMMReport` (*gene, hmmer\_output, cfg*)

Handle HMM report. Extract a synthetic report from the raw hmmer output. Dedicated to ‘gembase’ format datasets.

**extract** ()

Parse the output file of Hmmer obtained from a search in a ‘gembase’ set of sequences and produce a new synthetic report file.

## 15.5 Hit

**class** `macsypy.report.Hit` (*gene, system, hit\_id, hit\_seq\_length, replicon\_name, position\_hit, i\_eval, score, profile\_coverage, sequence\_coverage, begin\_match, end\_match*)

Handle the hits filtered from the Hmmer search. The hits are instantiated by `HMMReport.extract()` method

**\_\_cmp\_\_** (*other*)

Compare two Hits. If the sequence identifier is the same, do the comparison on the score. Otherwise, do it on alphabetical comparison of the sequence identifier.

**Parameters** *other* (`macsypy.report.Hit` object) – the hit to compare to the current object

**Returns** the result of the comparison

**\_\_eq\_\_** (*other*)

Return True if two hits are totally equivalent, False otherwise.

**Parameters** *other* (`macsypy.report.Hit` object) – the hit to compare to the current object

**Returns** the result of the comparison

**Return type** boolean

`__init__`(*gene*, *system*, *hit\_id*, *hit\_seq\_length*, *replicon\_name*, *position\_hit*, *i\_eval*, *score*, *profile\_coverage*, *sequence\_coverage*, *begin\_match*, *end\_match*)

**Parameters**

- **gene** (`macsypy.gene.Gene` object) – the gene corresponding to this profile
- **system** (`macsypy.system.System` object) – the system to which this gene belongs
- **hit\_id** (*string*) – the identifier of the hit
- **hit\_seq\_length** (*integer*) – the length of the hit sequence
- **replicon\_name** (*string*) – the name of the replicon
- **position\_hit** (*integer*) – the rank of the sequence matched in the input dataset file
- **i\_eval** (*float*) – the best-domain evaluate (i-evaluate, “independent evaluate”)
- **score** (*float*) – the score of the hit
- **profile\_coverage** (*float*) – percentage of the profile that matches the hit sequence
- **sequence\_coverage** (*float*) – percentage of the hit sequence that matches the profile
- **begin\_match** (*integer*) – where the hit with the profile starts in the sequence
- **end\_match** (*integer*) – where the hit with the profile ends in the sequence

`__str__`()

Print useful information on the Hit: regarding Hmmer statistics, and sequence information

`__weakref__`

list of weak references to the object (if defined)

`get_position`()

**Returns** the position of the hit (rank in the input dataset file)

**Return type** integer

`get_syst_inter_gene_max_space`()

**Returns** the ‘inter\_gene\_max\_space’ parameter defined for the gene of the hit

**Return type** integer

# SEARCH\_GENES API REFERENCE

`macsypy.search_genes.search_genes` (*genes*, *cfg*)

For each gene of the list, use the corresponding profile to perform an Hmmer search, and parse the output to generate a HMMReport that is saved in a file after Hit filtering. These tasks are performed in parallel using threads. The number of workers can be limited by `worker_nb` directive in the config object or in the command-line with the “-w” option.

## Parameters

- **genes** (list of `macsypy.gene.Gene` objects) – the genes to search in the input sequence dataset
- **cfg** (`macsypy.config.Config` object) – the configuration object



# SEARCH\_SYSTEMS API REFERENCE

**class** `macsyphy.search_systems.Cluster` (*systems\_to\_detect*)

Stores a set of contiguous hits. The Cluster object can have different states regarding its content in different genes' systems:

- ineligible: not a cluster to analyze
- clear: a single system is represented in the cluster
- ambiguous: several systems are represented in the cluster => might need a disambiguation

`__init__` (*systems\_to\_detect*)

**Parameters** `systems_to_detect` (a list of `macsyphy.system.System`) – the list of systems to be detected in this run

`__len__` ()

**Returns** the length of the Cluster, *i.e.*, the number of hits stored in it

**Return type** integer

`__str__` ()

print of the Cluster's hits stored in terms of components, and corresponding sequence identifier and positions

`__weakref__`

list of weak references to the object (if defined)

**add** (*hit*)

Add a Hit to a Cluster. Hits are always added at the end of the cluster (appended to the list of hits). Thus, 'begin' and 'end' positions of the Cluster are always the position of the 1st and of the last hit respectively.

**Parameters** `hit` (a `macsyphy.report.Hit`) – the Hit to add

**Raise** a `macsyphy.macsypy_error.SystemDetectionError`

**compatible\_systems**

**Returns** the list of the names of compatible systems represented by the cluster

**Return type** string

**putative\_system**

**Returns** the name of the putative system represented by the cluster

**Return type** string

**save** (*force=False*)

Check the status of the cluster regarding systems which have hits in it. Update systems represented, and assign a putative system (`self._putative_system`), which is the system with most hits in the cluster. The systems represented are stored in a dictionary in the `self.systems` variable. The execution of this function can be forced, even if it has already run for the cluster with the option `force=True`.

**state**

**Returns** the state of the Cluster of hits

**Return type** string

**class** `macsypy.search_systems.ClustersHandler`

Deals with sets of clusters found in a dataset. Conceived to store only clusters from a same replicon.

**\_\_init\_\_** ()

**Parameters** `cfg` (`macsypy.config.Config`) – The configuration object built from default and user parameters.

**\_\_weakref\_\_**

list of weak references to the object (if defined)

**circularize** (*rep\_info, end\_hits, systems\_to\_detect*)

This function takes into account the circularity of the replicon by merging clusters when appropriate (typically at replicon’s ends). It has to be called only if the `replicon_topology` is set to “circular”.

**Parameters**

- **rep\_info** (a namedTuple “RepliconInfo” `macsypy.database.RepliconInfo`) – an entry extracted from the `macsypy.database.RepliconDB`
- **end\_hits** (a list of `macsypy.report.Hit`) – a set of hits at ends of the replicon that were not introduced in clusters, and that might be part of a system overlapping the two “ends” of the replicon
- **systems\_to\_detect** (a list of `:class:macsypy.system.System`) – the set of systems to detect in this run

**class** `macsypy.search_systems.SystemNameGenerator`

Creates and stores the names of detected systems. Ensures the uniqueness of the names.

**\_\_weakref\_\_**

list of weak references to the object (if defined)

**\_computeBasename** (*replicon, system*)

Computes the base name to be used for unique name generation

**Parameters**

- **replicon** (*string*) – the replicon name
- **system** (*string*) – the system name

**Returns** the base name

**Return type** string

**getSystemName** (*replicon, system*)

Generates a unique system name based on the replicon’s name and the system’s name.

**Parameters**

- **replicon** (*string*) – the replicon name
- **system** (*string*) – the system name

**Returns** a unique system name

**Return type** string

**class** `macsypy.search_systems.SystemOccurence` (*system*)

This class is instantiated for a specific system that has been asked for detection. It can be filled step by step with hits. A decision can then be made according to the parameters defined *e.g.* quorum of genes.

**The SystemOccurence object has a “state” parameter, with the possible following values:**

- “empty” if the SystemOccurence has not yet been filled with genes of the decision rule of the system
- “no\_decision” if the filling process has started but the decision rule has not yet been applied to this occurrence
- “single\_locus”
- “multi\_loci”
- “uncomplete”

**\_\_init\_\_** (*system*)

**Parameters** `system` (`macsypy.system.System`) – the system to “fill” with hits.

**\_\_str\_\_** ()

**Returns** Information of the component content of the SystemOccurence.

**Return type** string

**\_\_weakref\_\_**

list of weak references to the object (if defined)

**compute\_missing\_genes\_list** (*gene\_dict*)

**Parameters** `gene_dict` (*dict*) – a dictionary with gene’s names as keys and number of occurrences as values

**Returns** the list of genes with no occurrence in the gene counter.

**Return type** list

**compute\_system\_length** (*rep\_info*)

Returns the length of the system, all loci gathered, in terms of protein number (even those not matching any system gene)

**Parameters** `rep_info` (a namedTuple “RepliconInfo” `macsypy.database.RepliconInfo`) – an entry extracted from the `macsypy.database.RepliconDB`

**Return type** integer

**count\_genes** (*gene\_dict*)

Counts the number of genes with at least one occurrence in a dictionary with a counter of genes.

**Parameters** `gene_dict` (*dict*) – a dictionary with gene’s names as keys and number of occurrences as values

**Return type** integer

**count\_genes\_tot** (*gene\_dict*)

Counts the number of matches in a dictionary with a counter of genes, independently of the nb of genes matched.

**Parameters** `gene_dict` (*dict*) – a dictionary with gene’s names as keys and number of occurrences as values

**Return type** integer

**count\_missing\_genes** (*gene\_dict*)

Counts the number of genes with no occurrence in the gene counter.

**Parameters** **gene\_dict** (*dict*) – a dictionary with gene’s names as keys and number of occurrences as values

**Return type** integer

**decision\_rule** ()

**This function applies the decision rules for system assessment in terms of quorum:**

- the absence of forbidden genes is checked
- the minimal number of mandatory genes is checked (“min\_mandatory\_genes\_required”)
- the minimal number of genes in the system is checked (“min\_genes\_required”)

When a decision is made, the status (`self.status`) of the `macsypy.search_systems.SystemOccurrence` is set either to:

- “single\_locus” when a complete system in the form of a single cluster was found
- “multi\_loci” when a complete system in the form of several clusters was found
- “uncomplete” when no system was assessed (quorum not reached)
- “empty” when no gene for this system was found
- “exclude” when no system was assessed (at least one forbidden gene was found)

**Returns** a printable message of the output decision with this SystemOccurrence

**Return type** string

**fill\_with\_cluster** (*cluster*)

Adds hits from a cluster to a system occurrence, and check which are their status according to the system definition. Set the system occurrence state to “no\_decision” after calling of this function.

**Parameters** **cluster** (`macsypy.search_systems.Cluster`) – the set of contiguous genes to treat for `macsypy.search_systems.SystemOccurrence` inclusion.

**fill\_with\_hits** (*hits, include\_forbidden*)

Adds hits to a system occurrence, and check what are their status according to the system definition. Set the system occurrence state to “no\_decision” after calling of this function.

---

**Note:** Forbidden genes will only be included if they do belong to the current system (and not to another specified with “system\_ref” in the current system’s definition).

---

**Parameters** **hits** – a list of Hits to treat for `macsypy.search_systems.SystemOccurrence` inclusion.

**fill\_with\_multi\_systems\_genes** (*multi\_systems\_hits*)

This function fills the SystemOccurrence with genes putatively coming from other systems (feature “multi\_system”). Those genes are used only if the occurrence of the corresponding gene was not yet filled with a gene from a cluster of the system.

**Parameters** **multi\_systems\_hits** – a list of hits of genes that are “multi\_system” which correspond to mandatory or accessory genes from the current system for which to fill a SystemOccurrence



**get\_gene\_counter\_output** (*forbid\_exclude=False*)

**Parameters** **forbid\_exclude** (*boolean*) – exclude the forbidden components if set to True. False by default.

**Returns** A dictionary ready for printing in system summary, with genes (mandatory, accessory and forbidden if specified) occurrences in the system occurrence.

**get\_gene\_ref** (*gene*)

**Parameters** **gene** (`macsypy.gene.Gene`, or `macsypy.gene.Homolog` or `macsypy.gene.Analog` object) – the gene to get its gene reference

**Returns** object `macsypy.gene.Gene` or None

**Return type** `macsypy.gene.Gene` object or None

**Raise** `KeyError` if the system does not contain any gene gene.

**get\_summary** (*replicon\_name, rep\_info*)

Gives a summary of the system occurrence in terms of gene content and localization.

**Parameters**

- **replicon\_name** (*string*) – the name of the replicon
- **rep\_info** (a namedTuple “RepliconInfo” `macsypy.database.RepliconInfo`) – an entry extracted from the `macsypy.database.RepliconDB`

**Returns** a tabulated summary of the `macsypy.search_systems.SystemOccurrence`

**Return type** string

**get\_summary\_header** ()

Returns a string with the description of the summary returned by `self.get_summary()`

**Return type** string

**get\_summary\_unordered** (*replicon\_name*)

Gives a summary of the system occurrence in terms of gene content only (specific of “unordered” datasets).

**Parameters** **replicon\_name** (*string*) – the name of the replicon

**Returns** a tabulated summary of the `macsypy.search_systems.SystemOccurrence`

**Return type** string

**get\_system\_name\_unordered** (*suffix='\_putative'*)

Attributes a name to the system occurrence for an “unordered” dataset => generating a generic name based on the system name and the suffix given.

**Parameters** **suffix** (*string*) – the suffix to be used for generating the systemOccurrence’s name

**Returns** a name for a system in an “unordered” dataset to the `macsypy.search_systems.SystemOccurrence`

**Return type** string

**get\_system\_unique\_name** (*replicon\_name*)

Attributes unique name to the system occurrence with the class `macsypy.search_systems.SystemNameGenerator`. Generates the name if not already set.

**Parameters** **replicon\_name** (*string*) – the name of the replicon

**Returns** the unique name of the `macsypy.search_systems.SystemOccurrence`

**Return type** string

**is\_complete()**

Test for SystemOccurrence completeness.

**Returns** True if the state of the SystemOccurrence is “single\_locus” or “multi\_loci”, False otherwise.

**Return type** boolean

**nb\_syst\_genes**

This value is set after a decision was made on the system in `macsypy.search_systems.SystemOccurrence.decision_rule()`

**Returns** the number of mandatory and accessory genes with at least one occurrence (number of different accessory genes)

**Return type** integer

**state**

**Returns** the state of the systemOccurrence.

**Return type** string

`macsypy.search_systems.analyze_clusters_replicon` (*clusters*, *systems*, *multi\_systems\_genes*)

Analyzes sets of contiguous hits (clusters) stored in a ClustersHandler for system detection:

- split clusters if needed
- delete them if they are not relevant
- add eventual genes from other systems “multi\_system” genes
- check the QUORUM for each system to detect, *i.e.* mandatory + accessory - forbidden

Only for “ordered” datasets representing a whole replicon. Reports systems occurrence.

**Parameters**

- **clusters** (`macsypy.search_systems.ClustersHandler`) – the set of clusters to analyze
- **systems** (a list of `macsypy.system.System`) – the set of systems to detect
- **multi\_systems\_genes** – a dictionary with genes that could belong to multiple systems (keys are system names)

**Returns** a set of systems occurrence filled with hits found in clusters

**Return type** a list of `macsypy.search_systems.SystemOccurrence`

`macsypy.search_systems.build_clusters` (*hits*, *systems\_to\_detect*, *rep\_info*)

Gets sets of contiguous hits according to the minimal inter\_gene\_max\_space between two genes. Only for “ordered” datasets.

**Parameters**

- **hits** (a list of `macsypy.report.Hit`) – a list of Hmmer hits to analyze
- **systems\_to\_detect** (a list of `macsypy.system.System`) – the list of systems to detect
- **cfg** (`macsypy.config.Config`) – the configuration object built from default and user parameters.
- **rep\_info** (a namedTuple “RepliconInfo” `macsypy.database.RepliconInfo`) – an entry extracted from the `macsypy.database.RepliconDB`

**Returns** a set of clusters and a dictionary with “multi\_system” genes stored in a system-wise way for further utilization.

**Return type** `macsypy.search_systems.ClustersHandler`

`macsypy.search_systems.disambiguate_cluster` (*cluster*)

This disambiguation step is used on clusters with hits for multiple systems (when `cluster.state` is set to “ambiguous”). It returns a “cleansed” list of clusters, ready to use for system occurrence detection (and that are “clear” cases). It:

- splits the cluster in two if it seems that two systems are nearby
- removes single hits that are not forbidden for the “main” system and that are at one end of the current cluster in this case, check that they are not “loners”, cause “loners” can be stored.

**Parameters** `cluster` (`macsypy.search_systems.Cluster`) – the cluster to “disambiguate”

`macsypy.search_systems.get_best_hits` (*hits*, *tosort=False*, *criterion='score'*)

Returns from a putatively redundant list of hits, a list of best matching hits. Analyzes quorum and co-localization if required for system detection. By default, hits are already sorted by position, and the hit with the best score is kept, then the best i-evalue. Possible criteria are:

- maximal score (`criterion="score"`)
- minimal i-evalue (`criterion="i_eval"`)
- maximal percentage of the profile covered by the alignment with the query sequence (`criterion="profile_coverage"`)

#### Parameters

- **tosort** (*boolean*) – tells if the hits have to be sorted
- **criterion** (*string*) – the criterion to base the sorting on

**Returns** the list of best matching hits

**Return type** list of `macsypy.report.Hit`

**Raise** a `macsypy.macsypy_error.MacsypyError`

`macsypy.search_systems.get_compatible_systems` (*systems\_list1*, *systems\_list2*)

Returns the intersection of the two input systems lists.

**Parameters** `systems_list2` (*systems\_list1*) – two lists of systems

**Returns** a list of systems, or an empty list if no common system

**Return type** a list of `macsypy.system.System`

`macsypy.search_systems.search_systems` (*hits*, *systems*, *cfg*)

Runs search of systems from a set of hits. Criteria for system assessment will depend on the kind of input dataset provided:

- analyze **quorum and co-localization** for “ordered\_replicon” and “gembase” datasets.
- analyze **quorum only** (and in a limited way) for “unordered\_replicon” and “unordered” datasets.

#### Parameters

- **hits** (list of `macsypy.report.Hit`) – the list of hits for input systems components
- **systems** (list of `macsypy.system.System`) – the list of systems asked for detection

- `cfg` (`macsypy.config.Config`) – the configuration object

```
class macsypy.search_systems.systemDetectionReportOrdered (replicon_name, systems_occurences_list, cfg)
```

Stores the detected systems to report for each replicon:

- by system name,
- by state of the systems (single vs multi loci)

```
__init__ (replicon_name, systems_occurences_list, cfg)
```

#### Parameters

- **replicon\_name** (*string*) – the name of the replicon
- **systems\_occurences\_list** (list of `macsypy.search_systems.SystemOccurence`) – the list of system’s occurrences to consider

```
_match2json (valid_hit, so)
```

#### Parameters

- **valid\_hit** (class:`macsypy.search_system.ValidHit` object.) – the valid hit to transform in to json.
- **so** (class:`macsypy.search_system.SystemOccurence`.) – the system occurrence where the valid hit come from.

```
counter_output ()
```

Builds a counter of systems per replicon, with different “states” separated (single-locus vs multi-loci systems)

**Returns** the counter of systems

**Return type** Counter

```
json_output (json_path, json_data)
```

```
report_output (reportfilename, print_header=False)
```

Writes a report of sequences forming the detected systems, with information in their status in the system, their localization on replicons, and statistics on the Hits.

#### Parameters

- **reportfilename** (*string*) – the output file name
- **print\_header** (*boolean*) – True if the header has to be written. False otherwise

```
summary_output (reportfilename, rep_info, print_header=False)
```

Writes a report with the summary of systems detected in replicons. For each system, a summary is done including:

- the number of mandatory/accessory genes in the reference system (as defined in XML files)
- the number of mandatory/accessory genes detected
- the number and list of missing genes
- the number of loci encoding the system

#### Parameters

- **rep\_info** (a namedTuple “RepliconInfo” `macsypy.database.RepliconInfo`) – an entry extracted from the `macsypy.database.RepliconDB`

- **print\_header** (*boolean*) – True if the header has to be written. False otherwise

**system\_2\_json** (*rep\_db*)

Generates the report in json format

**Parameters**

- **path** (*string*) – the path to a file where to write the report in json format
- **rep\_db** (a class:*macsypy.database.RepliconDB* object) – the replicon database

**tabulated\_output** (*system\_occurrence\_states, system\_names, reportfilename, print\_header=False*)

Write a tabulated output with number of detected systems for each replicon.

**Parameters**

- **system\_occurrence\_states** (*list of string*) – the different forms of detected systems to consider
- **reportfilename** (*string*) – the output file name
- **print\_header** (*boolean*) – True if the header has to be written. False otherwise

**Return type** string

**tabulated\_output\_header** (*system\_occurrence\_states, system\_names*)

Returns a string containing the header of the tabulated output

**Parameters** **system\_occurrence\_states** (*list of string*) – the different forms of detected systems to consider

**Return type** string

**class** *macsypy.search\_systems*.**systemDetectionReportUnordered** (*systems\_occurrences\_list, cfg*)

**Stores a report for putative detected systems gathering all hits from a search in an unordered dataset:**

- by system.

Mandatory and accessory genes only are reported in the “json” and “report” output, but all hits matching a system component are reported in the “summary”.

**\_\_init\_\_** (*systems\_occurrences\_list, cfg*)

**Parameters** **systems\_occurrences\_list** (list of *macsypy.search\_systems.SystemOccurrence*) – the list of system’s occurrences to consider

**json\_output** (*json\_path*)

Generates the report in json format

**Parameters** **path** (*string*) – the path to a file where to write the report in json format

**report\_output** (*reportfilename, print\_header=False*)

Writes a report of sequences forming the detected systems, with information in their status in the system, their localization on replicons, and statistics on the Hits.

**Parameters**

- **reportfilename** (*string*) – the output file name
- **print\_header** (*boolean*) – True if the header has to be written. False otherwise

**summary\_output** (*reportfilename, print\_header=False*)

Writes a report with the summary for putative systems in an unordered dataset. For each system, a summary is done including:

- the number of mandatory/accessory genes in the reference system (as defined in XML files)
- the number of mandatory/accessory genes detected

**Parameters**

- **reportfilename** (*string*) – the output file name
- **print\_header** (*boolean*) – True if the header has to be written. False otherwise

**class** `macsypy.search_systems.validSystemHit` (*hit, detected\_system, gene\_status*)

Encapsulates a `macsypy.report.Hit` This class stores a Hit that has been attributed to a detected system. Thus, it also stores:

- the system,
- the status of the gene in this system,

It also aims at storing information for results extraction:

- system extraction (e.g. genomic positions)
- sequence extraction

`__init__` (*hit, detected\_system, gene\_status*)

**Parameters**

- **hit** (`macsypy.report.Hit`) – a hit to base the validSystemHit on
- **detected\_system** (*string*) – the name of the predicted System
- **gene\_status** (*string*) – the “role” of the gene in the predicted system

`__weakref__`

list of weak references to the object (if defined)

`output_system_header` ()

**Returns** the header for the output file

**Return type** string

# MACSYFINDER ERRORS

## 18.1 macsypy\_error API reference

**exception** `macsypy.macsypy_error.MacsypyError`

The base class for MacSyFinder specific exceptions.

**`__weakref__`**

list of weak references to the object (if defined)

**exception** `macsypy.macsypy_error.SystemDetectionError`

Raised when the detection of systems from Hits encountered a problem.

**exception** `macsypy.macsypy_error.SystemInconsistencyError`

Raised when a secretion system is not consistent.





## **Part IV**

# **Indices and tables**



- *genindex*
- *modindex*
- *search*



# PYTHON MODULE INDEX

## m

- `macsypy.config`, 41
- `macsypy.database`, 47
- `macsypy.gene`, 65
- `macsypy.macsypy_error`, 83
- `macsypy.report`, 69
- `macsypy.search_genes`, 71
- `macsypy.search_systems`, 73
- `macsypy.system`, 52
- `macsypy.system_parser`, 56



# INDEX

## Symbols

- `__cmp__()` (macsypy.report.Hit method), 69
- `__contains__()` (macsypy.database.RepliconDB method), 48
- `__contains__()` (macsypy.gene.GeneBank method), 59
- `__contains__()` (macsypy.system.SystemBank method), 51
- `__eq__()` (macsypy.gene.Gene method), 60
- `__eq__()` (macsypy.report.Hit method), 69
- `__getitem__()` (macsypy.database.RepliconDB method), 48
- `__getitem__()` (macsypy.gene.GeneBank method), 59
- `__getitem__()` (macsypy.system.SystemBank method), 51
- `__getnewargs__()` (macsypy.database.RepliconInfo method), 49
- `__init__()` (macsypy.config.Config method), 41
- `__init__()` (macsypy.database.Indexes method), 47
- `__init__()` (macsypy.database.RepliconDB method), 48
- `__init__()` (macsypy.gene.Analog method), 63
- `__init__()` (macsypy.gene.Gene method), 60
- `__init__()` (macsypy.gene.Homolog method), 63
- `__init__()` (macsypy.gene.Profile method), 65
- `__init__()` (macsypy.report.HMMReport method), 67
- `__init__()` (macsypy.report.Hit method), 69
- `__init__()` (macsypy.search\_systems.Cluster method), 73
- `__init__()` (macsypy.search\_systems.ClustersHandler method), 74
- `__init__()` (macsypy.search\_systems.SystemOccurence method), 75
- `__init__()` (macsypy.search\_systems.systemDetectionReportOrdered method), 80
- `__init__()` (macsypy.search\_systems.systemDetectionReportUnordered method), 81
- `__init__()` (macsypy.search\_systems.validSystemHit method), 82
- `__init__()` (macsypy.system.System method), 52
- `__init__()` (macsypy.system\_parser.SystemParser method), 56
- `__iter__()` (macsypy.gene.GeneBank method), 59
- `__iter__()` (macsypy.system.SystemBank method), 51
- `__len__()` (macsypy.gene.Profile method), 65
- `__len__()` (macsypy.search\_systems.Cluster method), 73
- `__len__()` (macsypy.system.SystemBank method), 51
- `__metaclass__` (macsypy.report.HMMReport attribute), 67
- `__new__()` (macsypy.database.RepliconInfo static method), 49
- `__repr__()` (macsypy.database.RepliconInfo method), 49
- `__str__()` (macsypy.gene.Gene method), 60
- `__str__()` (macsypy.gene.Profile method), 66
- `__str__()` (macsypy.report.HMMReport method), 67
- `__str__()` (macsypy.report.Hit method), 70
- `__str__()` (macsypy.search\_systems.Cluster method), 73
- `__str__()` (macsypy.search\_systems.SystemOccurence method), 75
- `__weakref__` (macsypy.config.Config attribute), 42
- `__weakref__` (macsypy.database.Indexes attribute), 47
- `__weakref__` (macsypy.database.RepliconDB attribute), 48
- `__weakref__` (macsypy.gene.Analog attribute), 63
- `__weakref__` (macsypy.gene.Gene attribute), 61
- `__weakref__` (macsypy.gene.GeneBank attribute), 60
- `__weakref__` (macsypy.gene.Homolog attribute), 63
- `__weakref__` (macsypy.gene.Profile attribute), 66
- `__weakref__` (macsypy.macsypy\_error.MacsypyError attribute), 83
- `__weakref__` (macsypy.report.HMMReport attribute), 67
- `__weakref__` (macsypy.report.Hit attribute), 70
- `__weakref__` (macsypy.search\_systems.Cluster attribute), 73
- `__weakref__` (macsypy.search\_systems.ClustersHandler attribute), 74
- `__weakref__` (macsypy.search\_systems.SystemNameGenerator attribute), 74
- `__weakref__` (macsypy.search\_systems.SystemOccurence attribute), 75
- `__weakref__` (macsypy.search\_systems.validSystemHit attribute), 82
- `__weakref__` (macsypy.system.System attribute), 52
- `__weakref__` (macsypy.system.SystemBank attribute), 51
- `__weakref__` (macsypy.system\_parser.SystemParser attribute), 56
- `__asdict__()` (macsypy.database.RepliconInfo method), 49

\_build\_hmmer\_indexes() (macsypy.database.Indexes method), 47  
 \_build\_my\_db() (macsypy.report.HMMReport method), 67  
 \_build\_my\_indexes() (macsypy.database.Indexes method), 48  
 \_computeBasename() (macsypy.search\_systems.SystemNameGenerator method), 74  
 \_create\_genes() (macsypy.system\_parser.SystemParser method), 56  
 \_create\_system() (macsypy.system\_parser.SystemParser method), 57  
 \_fill() (macsypy.system\_parser.SystemParser method), 57  
 \_fill\_gembase\_min\_max() (macsypy.database.RepliconDB method), 48  
 \_fill\_my\_db() (macsypy.report.HMMReport method), 67  
 \_fill\_ordered\_min\_max() (macsypy.database.RepliconDB method), 49  
 \_fill\_topology() (macsypy.database.RepliconDB method), 49  
 \_hit\_start() (macsypy.report.HMMReport method), 68  
 \_len() (macsypy.gene.Profile method), 66  
 \_make() (macsypy.database.RepliconInfo class method), 49  
 \_match2json() (macsypy.search\_systems.systemDetectionReportOrdered method), 80  
 \_parse\_analog() (macsypy.system\_parser.SystemParser method), 57  
 \_parse\_hmm\_body() (macsypy.report.HMMReport method), 68  
 \_parse\_hmm\_header() (macsypy.report.HMMReport method), 68  
 \_parse\_homolog() (macsypy.system\_parser.SystemParser method), 57  
 \_replace() (macsypy.database.RepliconInfo method), 49  
 \_validate() (macsypy.config.Config method), 42

## A

accessory\_genes (macsypy.system.System attribute), 52  
 add() (macsypy.search\_systems.Cluster method), 73  
 add\_accessory\_gene() (macsypy.system.System method), 52  
 add\_analog() (macsypy.gene.Gene method), 61  
 add\_forbidden\_gene() (macsypy.system.System method), 52  
 add\_gene() (macsypy.gene.GeneBank method), 60  
 add\_homolog() (macsypy.gene.Gene method), 61  
 add\_mandatory\_gene() (macsypy.system.System method), 52  
 add\_system() (macsypy.system.SystemBank method), 51  
 Analog (class in macsypy.gene), 63  
 analyze\_clusters\_replicon() (in module macsypy.search\_systems), 78

## B

best\_hit() (macsypy.report.HMMReport method), 68  
 build() (macsypy.database.Indexes method), 48  
 build\_clusters() (in module macsypy.search\_systems), 78  
 build\_indexes (macsypy.config.Config attribute), 42

## C

check\_consistency() (macsypy.system\_parser.SystemParser method), 57  
 circularize() (macsypy.search\_systems.ClustersHandler method), 74  
 Cluster (class in macsypy.search\_systems), 73  
 ClustersHandler (class in macsypy.search\_systems), 74  
 compatible\_systems (macsypy.search\_systems.Cluster attribute), 73  
 compute\_missing\_genes\_list() (macsypy.search\_systems.SystemOccurrence method), 75  
 compute\_system\_length() (macsypy.search\_systems.SystemOccurrence method), 75  
 Config (class in macsypy.config), 41  
 count\_genes() (macsypy.search\_systems.SystemOccurrence method), 75  
 count\_genes\_tot() (macsypy.search\_systems.SystemOccurrence method), 75  
 count\_missing\_genes() (macsypy.search\_systems.SystemOccurrence method), 76  
 counter\_output() (macsypy.search\_systems.systemDetectionReportOrdered method), 80  
 coverage\_profile (macsypy.config.Config attribute), 43

## D

db\_type (macsypy.config.Config attribute), 43  
 decision\_rule() (macsypy.search\_systems.SystemOccurrence method), 76  
 def\_dir (macsypy.config.Config attribute), 43  
 disambiguate\_cluster() (in module macsypy.search\_systems), 79

## E

e\_value\_res (macsypy.config.Config attribute), 43  
 exchangeable (macsypy.gene.Gene attribute), 61  
 execute() (macsypy.gene.Profile method), 66  
 extract() (macsypy.report.GembaseHMMReport method), 69  
 extract() (macsypy.report.GeneralHMMReport method), 69  
 extract() (macsypy.report.HMMReport method), 68



extract() (macsypy.report.OrderedHMMReport method), 69

## F

fasta\_iter() (in module macsypy.database), 50

fill\_with\_cluster() (macsypy.search\_systems.SystemOccurrence method), 76

fill\_with\_hits() (macsypy.search\_systems.SystemOccurrence method), 76

fill\_with\_multi\_systems\_genes() (macsypy.search\_systems.SystemOccurrence method), 76

find\_hmmer\_indexes() (macsypy.database.Indexes method), 48

find\_my\_indexes() (macsypy.database.Indexes method), 48

forbidden\_genes (macsypy.system.System attribute), 52

## G

GembaseHMMReport (class in macsypy.report), 69

Gene (class in macsypy.gene), 60

gene (macsypy.gene.Analog attribute), 63

gene (macsypy.gene.Homolog attribute), 63

gene\_ref (macsypy.gene.Analog attribute), 63

gene\_ref (macsypy.gene.Homolog attribute), 63

GeneBank (class in macsypy.gene), 59

GeneralHMMReport (class in macsypy.report), 69

genes (macsypy.database.RepliconInfo attribute), 49

get() (macsypy.database.RepliconDB method), 49

get\_analogs() (macsypy.gene.Gene method), 61

get\_best\_hits() (in module macsypy.search\_systems), 79

get\_compatible\_systems() (in module macsypy.search\_systems), 79

get\_compatible\_systems() (macsypy.gene.Gene method), 61

get\_gene() (macsypy.system.System method), 52

get\_gene\_counter\_output() (macsypy.search\_systems.SystemOccurrence method), 76

get\_gene\_ref() (macsypy.search\_systems.SystemOccurrence method), 77

get\_gene\_ref() (macsypy.system.System method), 53

get\_homologs() (macsypy.gene.Gene method), 61

get\_position() (macsypy.report.Hit method), 70

get\_profile() (macsypy.gene.ProfileFactory method), 65

get\_summary() (macsypy.search\_systems.SystemOccurrence method), 77

get\_summary\_header() (macsypy.search\_systems.SystemOccurrence method), 77

get\_summary\_unordered() (macsypy.search\_systems.SystemOccurrence method), 77

get\_syst\_inter\_gene\_max\_space() (macsypy.report.Hit method), 70

get\_system\_name\_unordered() (macsypy.search\_systems.SystemOccurrence method), 77

get\_system\_unique\_name() (macsypy.search\_systems.SystemOccurrence method), 77

getSystemName() (macsypy.search\_systems.SystemNameGenerator method), 74

## H

Hit (class in macsypy.report), 69

hmmer\_dir (macsypy.config.Config attribute), 43

hmmer\_exe (macsypy.config.Config attribute), 43

HMMReport (class in macsypy.report), 67

Homolog (class in macsypy.gene), 63

## I

i\_value\_sel (macsypy.config.Config attribute), 43

index\_db\_exe (macsypy.config.Config attribute), 43

Indexes (class in macsypy.database), 47

inter\_gene\_max\_space (macsypy.gene.Gene attribute), 61

inter\_gene\_max\_space (macsypy.system.System attribute), 53

inter\_gene\_max\_space() (macsypy.config.Config method), 43

is\_accessory() (macsypy.gene.Gene method), 61

is\_aligned() (macsypy.gene.Homolog method), 63

is\_analog() (macsypy.gene.Gene method), 61

is\_authorized() (macsypy.gene.Gene method), 62

is\_complete() (macsypy.search\_systems.SystemOccurrence method), 78

is\_forbidden() (macsypy.gene.Gene method), 62

is\_homolog() (macsypy.gene.Gene method), 62

is\_mandatory() (macsypy.gene.Gene method), 62

items() (macsypy.database.RepliconDB method), 49

iteritems() (macsypy.database.RepliconDB method), 49

## J

json\_output() (macsypy.search\_systems.systemDetectionReportOrdered method), 80

json\_output() (macsypy.search\_systems.systemDetectionReportUnordered method), 81

## L

loner (macsypy.gene.Gene attribute), 62

## M

macsypy.config (module), 41

macsypy.database (module), 47

macsypy.gene (module), 59, 60, 63, 65

- macsypy.macsypy\_error (module), 83  
 macsypy.report (module), 67, 69  
 macsypy.search\_genes (module), 71  
 macsypy.search\_systems (module), 73  
 macsypy.system (module), 51, 52  
 macsypy.system\_parser (module), 56  
 MacsypyError, 83  
 mandatory\_genes (macsypy.system.System attribute), 53  
 max (macsypy.database.RepliconInfo attribute), 50  
 max\_nb\_genes (macsypy.system.System attribute), 53  
 max\_nb\_genes() (macsypy.config.Config method), 43  
 min (macsypy.database.RepliconInfo attribute), 50  
 min\_genes\_required (macsypy.system.System attribute), 53  
 min\_genes\_required() (macsypy.config.Config method), 44  
 min\_mandatory\_genes\_required (macsypy.system.System attribute), 53  
 min\_mandatory\_genes\_required() (macsypy.config.Config method), 44  
 multi\_loci (macsypy.system.System attribute), 53  
 multi\_loci() (macsypy.config.Config method), 44  
 multi\_system (macsypy.gene.Gene attribute), 62
- ## N
- nb\_syst\_genes (macsypy.search\_systems.SystemOccurence attribute), 78
- ## O
- OrderedHMMReport (class in macsypy.report), 69  
 output\_system\_header() (macsypy.search\_systems.validSystemHit method), 82
- ## P
- parse() (macsypy.system\_parser.SystemParser method), 58  
 previous\_run (macsypy.config.Config attribute), 44  
 Profile (class in macsypy.gene), 65  
 profile (macsypy.gene.Gene attribute), 62  
 profile\_dir (macsypy.config.Config attribute), 44  
 profile\_suffix (macsypy.config.Config attribute), 44  
 ProfileFactory (class in macsypy.gene), 65  
 putative\_system (macsypy.search\_systems.Cluster attribute), 73
- ## R
- replicon\_infos() (macsypy.database.RepliconDB method), 49  
 replicon\_names() (macsypy.database.RepliconDB method), 49  
 replicon\_topology (macsypy.config.Config attribute), 44  
 RepliconDB (class in macsypy.database), 48  
 RepliconInfo (class in macsypy.database), 49  
 report\_output() (macsypy.search\_systems.systemDetectionReportOrdered method), 80  
 report\_output() (macsypy.search\_systems.systemDetectionReportUnordered method), 81  
 res\_extract\_suffix (macsypy.config.Config attribute), 44  
 res\_search\_dir (macsypy.config.Config attribute), 44  
 res\_search\_suffix (macsypy.config.Config attribute), 44
- ## S
- save() (macsypy.config.Config method), 44  
 save() (macsypy.search\_systems.Cluster method), 73  
 save\_extract() (macsypy.report.HMMReport method), 68  
 search\_genes() (in module macsypy.search\_genes), 71  
 search\_systems() (in module macsypy.search\_systems), 79  
 sequence\_db (macsypy.config.Config attribute), 45  
 state (macsypy.search\_systems.Cluster attribute), 74  
 state (macsypy.search\_systems.SystemOccurence attribute), 78  
 summary\_output() (macsypy.search\_systems.systemDetectionReportOrdered method), 80  
 summary\_output() (macsypy.search\_systems.systemDetectionReportUnordered method), 81  
 System (class in macsypy.system), 52  
 system (macsypy.gene.Gene attribute), 62  
 system\_2\_json() (macsypy.search\_systems.systemDetectionReportOrdered method), 81  
 system\_to\_parse() (macsypy.system\_parser.SystemParser method), 58  
 SystemBank (class in macsypy.system), 51  
 SystemDetectionError, 83  
 systemDetectionReportOrdered (class in macsypy.search\_systems), 80  
 systemDetectionReportUnordered (class in macsypy.search\_systems), 81  
 SystemInconsistencyError, 83  
 SystemNameGenerator (class in macsypy.search\_systems), 74  
 SystemOccurence (class in macsypy.search\_systems), 75  
 SystemParser (class in macsypy.system\_parser), 56
- ## T
- tabulated\_output() (macsypy.search\_systems.systemDetectionReportOrdered method), 81  
 tabulated\_output\_header() (macsypy.search\_systems.systemDetectionReportOrdered method), 81  
 topology (macsypy.database.RepliconInfo attribute), 50  
 topology\_file (macsypy.config.Config attribute), 45

## V

validSystemHit (class in macsypy.search\_systems), 82

## W

worker\_nb (macsypy.config.Config attribute), 45

working\_dir (macsypy.config.Config attribute), 45
